# Supplementary material
Source: publisher site journal article supplement (https://www.spandidos-publications.com/3384/downloadSupplementary)
Supplement: Supplementary file 1 [file downloadSupplementary]

## Sheet: 工作表1
Table SIX. DMRs in cardiac defects irrespective of whether they are isolated
ID	logFC	P.Value	Annotation	region	gene	promoter_gene
chr6:41994502-41999295	3.10133	3.68267e-05	promoter region:MED20|NM_004275(-)//BYSL|NM_004053(+)	promoter region	MED20	MED20
chr17:8006408-8009458	-2.98862	5.92955e-05	promoter region:VAMP2|NM_014232(-)	promoter region	VAMP2	VAMP2
chr7:76093946-76096996	-2.92604	6.11895e-05	promoter region:POMZP3|NM_152992(-)//POMZP3|NM_012230(-)	promoter region	POMZP3	POMZP3
chr18:74653532-74654233	-2.86792	6.80028e-05	left:GALR1|NM_001480(1562537+)	left	GALR1
chr6:41619701-41624167	-2.70917	7.73849e-05	promoter region:FOXP4|NM_138457(+)//FOXP4|NM_001012427(+)//FOXP4|NM_001012426(+)	promoter region	FOXP4	FOXP4
chr20:31695597-31696298	-2.72094	7.75581e-05	within:CBFA2T2|NM_001039709(+)//CBFA2T2|NM_005093(+)//CBFA2T2|NM_001032999(+)	within	CBFA2T2
chrX:70901499-70902199	-2.72345	7.79068e-05	within:CXorf49|NM_001145140(+)//CXorf49B|NM_001145139(+)	within	CXorf49
chr20:55118611-55119311	-2.70515	7.79259e-05	left:TFAP2C|NM_003222(480847+)	left	TFAP2C
chr7:98759005-98762055	-2.75167	8.00884e-05	promoter region:ARPC1A|NM_006409(+)	promoter region	ARPC1A	ARPC1A
chr3:47862641-47863342	-2.6871	8.15776e-05	within:DHX30|NM_138615(+)//DHX30|NM_014966(+)	within	DHX30
chr20:39679759-39682987	-2.71833	8.20045e-05	promoter region:CHD6|NM_032221(-)	promoter region	CHD6	CHD6
chrY:786383-787083	-2.69563	8.34897e-05	left:SHOX|NM_006883//SHOX|NM_000451(281305+)	left	SHOX
chr9:70871582-70872282	-2.65696	8.40417e-05	within:FXN|NM_181425(+)//FXN|NM_000144(+)	within	FXN
chr22:47524042-47524743	-2.64533	8.47117e-05	within:FAM19A5|NM_015381(+)//FAM19A5|NM_001082967(+)	within	FAM19A5
chr7:56917237-56917937	-2.67193	8.5091e-05	left:|NR_027050(69314-)	left
chr7:55379459-55380266	-2.62237	8.59302e-05	left:EGFR|NM_201283//EGFR|NM_201282//EGFR|NM_201284//EGFR|NM_005228(325241+)	left	EGFR
chr22:41372329-41377789	-2.6551	8.59499e-05	promoter region:CYB5R3|NM_001129819(-)//CYB5R3|NM_007326(-)//CYB5R3|NM_000398(-)	promoter region	CYB5R3	CYB5R3
chr22:40854675-40855852	-2.6431	8.62828e-05	within:CYP2D6|NM_000106(-)//CYP2D6|NM_001025161(-)	within	CYP2D6
chr13:112735275-112735976	-2.65823	8.64224e-05	within:MCF2L|NM_001112732(+)//MCF2L|NM_024979(+)	within	MCF2L
chr19:11076755-11077456	-2.61792	8.76472e-05	within:LDLR|NM_000527(+)	within	LDLR
chr3:52453473-52456523	-2.64062	8.77902e-05	promoter region:SEMA3G|NM_020163(-)	promoter region	SEMA3G	SEMA3G
chr22:16007231-16008723	-2.60994	8.79371e-05	within:CECR5|NM_017829(-)//CECR5|NM_033070(-)	within	CECR5
chr11:117359875-117362925	-2.66483	8.80225e-05	promoter region:IL10RA|NR_026691(+)//IL10RA|NM_001558(+)	promoter region	IL10RA	IL10RA
chr10:104208719-104211769	-2.65479	8.82156e-05	promoter region:TMEM180|NM_024789(+)	promoter region	TMEM180	TMEM180
chr10:135082661-135083361	-2.60864	8.83086e-05	within:MTG1|NM_138384(+)	within	MTG1
chr2:25207684-25208384	-2.6275	8.94722e-05	within:EFR3B|NM_014971(+)	within	EFR3B
chr3:49915700-49918750	-2.59687	8.95602e-05	promoter region:MST1R|NM_002447(-)	promoter region	MST1R	MST1R
chr15:19336057-19339107	-2.5919	8.98717e-05	promoter region:POTEB|NM_207355(-)	promoter region	POTEB	POTEB
chr4_random:498283-498983	-2.648	9.03667e-05	within:LOC100132288|NM_001033515(-)	within	LOC100132288
chr14:102919013-102922461	-2.63008	9.04758e-05	promoter region:MARK3|NM_001128921(+)//MARK3|NM_002376(+)//MARK3|NM_001128918(+)//MARK3|NM_001128919(+)//MARK3|NM_001128920(+)	promoter region	MARK3	MARK3
chr8:37771141-37775258	-2.59098	9.08152e-05	promoter region:GPR124|NM_032777(+)	promoter region	GPR124	GPR124
chr17:3045122-3048172	-2.58433	9.08328e-05	promoter region:OR1A2|NM_012352(+)	promoter region	OR1A2	OR1A2
chr2:96890973-96891674	-2.61616	9.13369e-05	within:SEMA4C|NM_017789(-)	within	SEMA4C
chr15:72489857-72490557	-2.5885	9.13597e-05	within:SEMA7A|NM_001146030(-)//SEMA7A|NM_001146029(-)//SEMA7A|NM_003612(-)	within	SEMA7A
chr13:112713989-112715332	-2.57917	9.17806e-05	within:MCF2L|NM_001112732(+)//MCF2L|NM_024979(+)	within	MCF2L
chr2:132147609-132148309	-2.57795	9.25757e-05	left:CCDC74A|NM_138770(145648+)	left	CCDC74A
chr1:40892231-40892931	-2.64354	9.2736e-05	within:RIMS3|NM_014747(-)	within	RIMS3
chr15:72882157-72882858	-2.59607	9.28024e-05	left:CSK|NM_001127190//CSK|NM_004383(20680+)	left	CSK
chr5:167621710-167622411	-2.58562	9.2871e-05	within:ODZ2|NM_001122679(+)	within	ODZ2
chr9:133172942-133173643	-2.55961	9.41254e-05	within:PPAPDC3|NM_032728(+)	within	PPAPDC3
chr11:1983100-1983801	-2.54864	9.50181e-05	left:H19|NR_002196(7459-)	left	H19
chr9:138339312-138344040	-2.55731	9.55063e-05	promoter region:GPSM1|NM_015597(+)//LOC26102|NR_026964(-)//GPSM1|NM_001145638(+)	promoter region	GPSM1	GPSM1
chr19:63583591-63586641	-2.5508	9.55271e-05	promoter region:ZNF837|NM_138466(-)//ZNF837|NM_001129730(-)	promoter region	ZNF837	ZNF837
chr1:16217262-16221682	-2.55667	9.57342e-05	promoter region:CLCNKA|NM_001042704(+)//CLCNKA|NM_004070(+)//HSPB7|NM_014424(-)	promoter region	CLCNKA	CLCNKA
chr18:75006885-75007585	-2.58775	9.57561e-05	within:ATP9B|NM_198531(+)	within	ATP9B
chr16:2068490-2069765	-2.55737	9.57571e-05	within:TSC2|NM_000548(+)//TSC2|NM_001077183(+)//TSC2|NM_001114382(+)	within	TSC2
chr16:87314824-87315524	-2.59654	9.58802e-05	within:FAM38A|NM_001142864(-)	within	FAM38A
chr9:123561867-123562567	-2.56071	9.62449e-05	within:DAB2IP|NM_138709(+)//DAB2IP|NM_032552(+)	within	DAB2IP
chr1:149636224-149639274	-2.56225	9.66218e-05	promoter region:PSMB4|NM_002796(+)	promoter region	PSMB4	PSMB4
chr9:139117418-139118118	-2.53688	9.67984e-05	within:MAN1B1|NM_016219(+)	within	MAN1B1
chr7:35973536-35974679	-2.53638	9.75255e-05	left:SEPT7|NM_001011553//SEPT7|NM_001788(166385+)	left	SEPT7
chr17:39093847-39097228	-2.56161	9.7641e-05	promoter region:MEOX1|NM_013999(-)//MEOX1|NM_004527(-)//MEOX1|NM_001040002(-)	promoter region	MEOX1	MEOX1
chr19:1255564-1256264	-2.54721	9.78218e-05	left:EFNA2|NM_001405(18397+)	left	EFNA2
chrX:52966632-52967358	-2.63621	9.80149e-05	left:FAM156B|NM_001099684(21499+)	left	FAM156B
chr1:199462421-199463122	-2.60477	9.84198e-05	within:IGFN1|NM_178275(+)	within	IGFN1
chr11_random:1518-2219	-2.61313	9.95602e-05	left:	left	left:
chr9:139124741-139125441	-2.53319	9.973e-05	left:MAN1B1|NM_016219(23504+)	left	MAN1B1
chr1:1454170-1454870	-2.58027	9.99602e-05	within:ATAD3A|NM_018188(+)	within	ATAD3A
chr9:67903252-67903952	-2.58593	0.000100368	left:ANKRD20A1|NM_032250//ANKRD20A3|NM_001012419(386672+)	left	ANKRD20A1
chr2:32139743-32142970	2.85067	0.00010046	promoter region:SPAST|NM_199436(+)//SPAST|NM_014946(+)	promoter region	SPAST	SPAST
chr12:131079281-131082331	-2.53748	0.000100539	promoter region:SNORA49|NR_002979(+)	promoter region	SNORA49	SNORA49
chr18:42352437-42355487	-2.59372	0.000100662	promoter region:LOXHD1|NM_001145473(-)	promoter region	LOXHD1	LOXHD1
chr4:8358444-8359144	-2.54157	0.000100789	within:HTRA3|NM_053044(+)	within	HTRA3
chr9:138963963-138967607	-2.55208	0.000100799	promoter region:LCN12|NM_178536(+)	promoter region	LCN12	LCN12
chr15:99235091-99238656	-2.5493	0.000100888	promoter region:ALDH1A3|NM_000693(+)	promoter region	ALDH1A3	ALDH1A3
chr19:10892714-10893414	-2.53143	0.00010091	within:CARM1|NM_199141(+)	within	CARM1
chr22:17545061-17548741	-2.54033	0.000101099	promoter region:SLC25A1|NM_005984(-)	promoter region	SLC25A1	SLC25A1
chr5:1335596-1336297	-2.52835	0.000101322	within:TERT|NM_198253(-)//TERT|NM_198255(-)	within	TERT
chr19:11521060-11521760	-2.5032	0.00010138	within:CNN1|NM_001299(+)	within	CNN1
chr7:65946638-65949688	-2.55887	0.000101427	promoter region:LOC729156|NR_003934(-)	promoter region	LOC729156	LOC729156
chrY:24742156-24745206	-2.53488	0.000101444	promoter region:CSPG4P2Y|NR_002194(-)//CSPG4P1Y|NR_001554(-)	promoter region	CSPG4P2Y	CSPG4P2Y
chr22:21813631-21818122	-2.51903	0.000101579	promoter region:RAB36|NM_004914(+)//RTDR1|NM_014433(-)	promoter region	RAB36	RAB36
chr5:150009044-150009744	-2.54238	0.000101818	within:SYNPO|NM_007286(+)//SYNPO|NM_001109974(+)	within	SYNPO
chr14:20179080-20182130	-2.53512	0.00010191	promoter region:OR6S1|NM_001001968(-)	promoter region	OR6S1	OR6S1
chr19:54556413-54559966	-2.55161	0.000102005	promoter region:DKKL1|NM_014419(+)//TEAD2|NM_003598(-)	promoter region	DKKL1	DKKL1
chr20:61348057-61348758	-2.50156	0.000102137	within:NKAIN4|NM_152864(-)	within	NKAIN4
chr9:128492686-128493387	-2.49548	0.000102181	within:LMX1B|NM_002316(+)	within	LMX1B
chr16:2116879-2117580	-2.49406	0.000102533	within:PKD1|NM_000296(-)//PKD1|NM_001009944(-)	within	PKD1
chr8:145119018-145124293	-2.5492	0.000102709	promoter region:PLEC|NM_201378(-)//PLEC|NM_000445(-)	promoter region	PLEC	PLEC
chr7:2152164-2152864	-2.49536	0.000102773	within:MAD1L1|NM_003550(-)//MAD1L1|NM_001013837(-)//MAD1L1|NM_001013836(-)	within	MAD1L1
chr1:6124475-6125176	-2.56396	0.000102813	within:CHD5|NM_015557(-)	within	CHD5
chr9:137290223-137291050	-2.53319	0.00010301	left:OLFM1|NM_006334(183300+)	left	OLFM1
chrX:37964465-37967515	-2.5052	0.000103036	promoter region:SRPX|NM_006307(-)	promoter region	SRPX	SRPX
chr11:93773623-93776673	-2.48634	0.000103151	promoter region:GPR83|NM_016540(-)	promoter region	GPR83	GPR83
chr19:776390-779440	-2.6082	0.000103161	promoter region:AZU1|NM_001700(+)	promoter region	AZU1	AZU1
chr11:70911014-70911714	-2.55725	0.000103614	left:NADSYN1|NM_018161(69150+)	left	NADSYN1
chr19:61323583-61326901	2.87133	0.000103645	promoter region:ZNF787|NM_001002836(-)	promoter region	ZNF787	ZNF787
chr18:12767454-12768155	-2.49833	0.00010385	left:PSMG2|NM_020232(74391+)	left	PSMG2
chr22:49000973-49001674	-2.53979	0.000104191	within:TUBGCP6|NM_020461(-)	within	TUBGCP6
chr7:99806563-99809613	-2.5135	0.000104604	promoter region:PILRA|NM_178272(+)//PILRA|NM_013439(+)//PILRA|NM_178273(+)	promoter region	PILRA	PILRA
chr19:261070-261770	-2.49446	0.00010496	within:MIER2|NM_017550(-)	within	MIER2
chr9:136849597-136850298	-2.50175	0.000104968	within:COL5A1|NM_000093(+)	within	COL5A1
chrX:72215242-72218516	-2.53458	0.000104995	promoter region:PABPC1L2A|NM_001012977(-)	promoter region	PABPC1L2A	PABPC1L2A
chr19:56334929-56337979	-2.48888	0.000105238	promoter region:SIGLEC7|NM_014385(+)//SIGLEC7|NM_016543(+)	promoter region	SIGLEC7	SIGLEC7
chr17:43389499-43392549	-2.47814	0.000105404	promoter region:PRR15L|NM_024320(-)	promoter region	PRR15L	PRR15L
chr5:1518915-1520245	-2.50256	0.000105925	within:LPCAT1|NM_024830(-)	within	LPCAT1
chr21:14305192-14305893	-2.47323	0.000105985	left:C21orf81|NR_027270(30556-)	left	C21orf81
chr4:941580-942280	-2.48037	0.000106638	within:TMEM175|NM_032326(+)	within	TMEM175
chrX:142549076-142553125	-2.50296	0.000106979	promoter region:SLITRK4|NM_173078(-)	promoter region	SLITRK4	SLITRK4
chr10:134455574-134456378	-2.48327	0.000107053	left:NKX6-2|NM_177400(6047-)	left	NKX6-2
chr8:22134818-22135518	-2.53238	0.000107093	within:PHYHIP|NM_014759(-)//PHYHIP|NM_001099335(-)	within	PHYHIP
chr16:86777432-86778132	-2.4985	0.000107236	left:BANP|NM_079837//BANP|NM_017869(234894+)	left	BANP
chr9:139449053-139449753	-2.4781	0.000107282	within:ENTPD8|NM_001033113(-)//ENTPD8|NM_198585(-)	within	ENTPD8
chr22:25159573-25160273	-2.47333	0.000107592	within:ASPHD2|NM_020437(+)	within	ASPHD2
chr1:53330753-53331453	-2.56086	0.0001078	within:SLC1A7|NM_006671(-)	within	SLC1A7
chr11:45895640-45901349	-2.45777	0.000107871	promoter region:PEX16|NM_004813(-)//PEX16|NM_057174(-)//GYLTL1B|NM_152312(+)	promoter region	PEX16	PEX16
chr5:141213564-141214264	-2.51089	0.000108174	within:PCDH1|NM_032420(-)	within	PCDH1
chrX:152250366-152253416	-2.56839	0.000108217	promoter region:ZNF275|NM_001080485(+)	promoter region	ZNF275	ZNF275
chr14:104891733-104893020	-2.45186	0.000108367	within:PACS2|NM_001100913(+)//PACS2|NM_015197(+)	within	PACS2
chr3:52542049-52546573	-2.49063	0.000108565	promoter region:C3orf78|NM_001124767(+)//NT5DC2|NM_001134231(-)//NT5DC2|NM_022908(-)	promoter region	C3orf78	C3orf78
chr9:129728981-129732031	-2.46913	0.000108708	promoter region:PIP5KL1|NM_173492(-)	promoter region	PIP5KL1	PIP5KL1
chr20:61648691-61651741	-2.48997	0.000108902	promoter region:SRMS|NM_080823(-)	promoter region	SRMS	SRMS
chr17:37220047-37224417	-2.54103	0.000109039	promoter region:FKBP10|NM_021939(+)//SC65|NM_006455(-)	promoter region	FKBP10	FKBP10
chr9:140060888-140061588	-2.47793	0.000109087	within:CACNA1B|NM_000718(+)	within	CACNA1B
chr4:6975952-6976652	-2.48661	0.000109131	within:TBC1D14|NM_020773(+)//TBC1D14|NM_001113361(+)	within	TBC1D14
chr6:3201720-3204770	-2.46497	0.000109289	promoter region:PSMG4|NM_001135750(+)//PSMG4|NM_001128592(+)//PSMG4|NM_001128591(+)	promoter region	PSMG4	PSMG4
chr9:126308910-126311960	-2.49667	0.000109313	promoter region:NR5A1|NM_004959(-)	promoter region	NR5A1	NR5A1
chr4:3218124-3221245	-2.44656	0.000109531	promoter region:C4orf44|NM_001042690(+)//C4orf44|NM_001012982(+)	promoter region	C4orf44	C4orf44
chr1:3501423-3502124	-2.51022	0.000109572	within:MEGF6|NM_001409(-)	within	MEGF6
chrY:26036002-26039052	-2.45331	0.000109934	promoter region:CSPG4P2Y|NR_002194(+)//CSPG4P1Y|NR_001554(+)	promoter region	CSPG4P2Y	CSPG4P2Y
chr11:66947764-66948465	-2.44362	0.000110127	within:CARNS1|NM_020811(+)	within	CARNS1
chr19:45084176-45084877	-2.53183	0.000110698	within:FCGBP|NM_003890(-)	within	FCGBP
chr16:3720967-3721667	-2.43729	0.000110924	within:CREBBP|NM_001079846(-)//CREBBP|NM_004380(-)	within	CREBBP
chr2:233094858-233099775	-2.43982	0.000111038	promoter region:CHRND|NM_000751(+)	promoter region	CHRND	CHRND
chr5:7446902-7450022	-2.46465	0.000111206	promoter region:ADCY2|NM_020546(+)	promoter region	ADCY2	ADCY2
chr2:241584487-241587537	-2.45958	0.000111242	promoter region:SNED1|NM_001080437(+)	promoter region	SNED1	SNED1
chr20:61165848-61166548	-2.4992	0.000111506	left:BHLHE23|NM_080606(57016-)	left	BHLHE23
chr16:14832703-14835753	-2.5025	0.00011172	promoter region:NOMO1|NM_014287(+)	promoter region	NOMO1	NOMO1
chr7:157395551-157396252	-2.5453	0.000112273	within:PTPRN2|NM_130842(-)//PTPRN2|NM_130843(-)//PTPRN2|NM_002847(-)	within	PTPRN2
chr7:285611-288882	-2.45283	0.000112298	promoter region:FAM20C|NM_020223(+)	promoter region	FAM20C	FAM20C
chr1:152180734-152181435	-2.46621	0.000112807	within:DENND4B|NM_014856(-)	within	DENND4B
chr11:64446315-64449365	-2.42772	0.000112953	promoter region:PPP2R5B|NM_006244(+)	promoter region	PPP2R5B	PPP2R5B
chr13:112683427-112684128	-2.46475	0.000113599	within:MCF2L|NM_001112732(+)//MCF2L|NM_024979(+)	within	MCF2L
chr9:125141378-125142079	-2.47094	0.000113762	left:STRBP|NM_018387(70714-)	left	STRBP
chr11:1210424-1211125	-2.42885	0.000113878	within:MUC5AC|NM_017511(+)//MUC5B|NM_002458(+)	within	MUC5AC
chr6:44340791-44343943	-2.46501	0.000113934	promoter region:NFKBIE|NM_004556(-)	promoter region	NFKBIE	NFKBIE
chr22:19646977-19652056	-2.43038	0.000114254	promoter region:AIFM3|NR_027464(+)//AIFM3|NM_001146288(+)//AIFM3|NM_144704(+)//AIFM3|NM_001018060(+)	promoter region	AIFM3	AIFM3
chr8:145620032-145620732	-2.44657	0.000114381	within:VPS28|NM_183057(-)//VPS28|NM_016208(-)	within	VPS28
chr22:18327629-18330679	-2.43564	0.000114705	promoter region:COMT|NM_007310(+)	promoter region	COMT	COMT
chr16:65984312-65987362	-2.47714	0.000114773	promoter region:TPPP3|NM_015964(-)//TPPP3|NM_016140(-)	promoter region	TPPP3	TPPP3
chr6:150367363-150370413	-2.45421	0.000114904	promoter region:RAET1K|NR_024045(-)	promoter region	RAET1K	RAET1K
chr1:226534503-226535204	-2.46635	0.000114958	within:OBSCN|NM_052843(+)//OBSCN|NM_001098623(+)	within	OBSCN
chr17:77954821-77955522	-2.43438	0.000115314	within:C17orf101|NM_175902(-)//C17orf101|NM_024648(-)	within	C17orf101
chr17:75802689-75803852	-2.46133	0.000115496	within:SGSH|NM_000199(-)	within	SGSH
chr17:76471993-76472693	-2.47067	0.000115868	within:RPTOR|NM_020761(+)	within	RPTOR
chr16:28794869-28797919	-2.42742	0.000115944	promoter region:ATP2A1|NM_004320(+)//ATP2A1|NM_173201(+)	promoter region	ATP2A1	ATP2A1
chr20:62137496-62141174	-2.47298	0.00011646	promoter region:NCRNA00176|NM_207349(+)	promoter region	NCRNA00176	NCRNA00176
chr21:44566758-44567459	-2.4064	0.00011651	within:PFKL|NM_002626(+)//PFKL|NR_024108(+)	within	PFKL
chr22:44697204-44697904	-2.40833	0.000116838	within:WNT7B|NM_058238(-)	within	WNT7B
chr19:1263787-1264528	-2.41168	0.000116868	left:EFNA2|NM_001405(26620+)	left	EFNA2
chr11:68206118-68209422	-2.41611	0.00011706	promoter region:GAL|NM_015973(+)	promoter region	GAL	GAL
chr10:48877221-48880271	-2.44842	0.000117129	promoter region:FAM25B|NM_001137556(-)//FAM25C|NM_001137548(-)//FAM25G|NM_001137549(-)	promoter region	FAM25B	FAM25B
chr16:615673-616374	-2.41635	0.000117379	within:RAB40C|NM_021168(+)	within	RAB40C
chrX:151399570-151400271	-2.46436	0.000117518	left:GABRA3|NM_000808(29083-)	left	GABRA3
chr6:150431285-150434335	-2.43441	0.000117583	promoter region:ULBP3|NM_024518(-)	promoter region	ULBP3	ULBP3
chr19:53994448-53995149	-2.465	0.000117799	within:BCAT2|NM_001190(-)	within	BCAT2
chr20:35238429-35243828	-2.44094	0.000117847	promoter region:RPN2|NM_002951(+)//C20orf132|NM_152503(-)//RPN2|NM_001135771(+)//C20orf132|NM_213632(-)//C20orf132|NM_213631(-)	promoter region	RPN2	RPN2
chr15:76073012-76076062	-2.42649	0.000118359	promoter region:LOC91450|NR_026998(-)	promoter region	LOC91450	LOC91450
chr19:60689241-60692291	-2.42047	0.000119596	promoter region:SSC5D|NM_001144950(+)	promoter region	SSC5D	SSC5D
chr1:154603186-154606236	-2.40479	0.000119819	promoter region:RHBG|NM_020407(+)//RHBG|NR_026549(+)	promoter region	RHBG	RHBG
chr19:61824970-61825996	-2.38208	0.000120181	within:ZNF71|NM_021216(+)	within	ZNF71
chr22:37705910-37708960	-2.39938	0.000120546	promoter region:APOBEC3B|NM_004900(+)	promoter region	APOBEC3B	APOBEC3B
chr6:34208811-34211861	-2.40375	0.000120588	promoter region:GRM4|NM_000841(-)	promoter region	GRM4	GRM4
chr21:45234577-45235278	-2.38037	0.000120836	left:C21orf70|NM_058190(50195+)	left	C21orf70
chr20:3658915-3661965	-2.44223	0.000121064	promoter region:HSPA12B|NM_052970(+)	promoter region	HSPA12B	HSPA12B
chr17:72980479-72983529	-2.37462	0.000121487	promoter region:SEPT9|NM_001113495(+)	promoter region	SEPT9	SEPT9
chr4:189317691-189318392	-2.56511	0.000121921	left:TRIML1|NM_178556(20100+)	left	TRIML1
chr2:27454662-27455363	-2.39562	0.000122438	within:ZNF513|NM_144631(-)	within	ZNF513
chr19:55601813-55602513	-2.43321	0.000122507	within:POLD1|NM_002691(+)	within	POLD1
chr17:1340947-1345191	-2.38568	0.000122659	promoter region:MYO1C|NM_033375(-)//MYO1C|NM_001080779(-)	promoter region	MYO1C	MYO1C
chr16:88304519-88306290	-2.50708	0.000122664	within:C16orf7|NM_004913(-)	within	C16orf7
chr1:35142961-35146011	-2.37772	0.00012277	promoter region:DLGAP3|NM_001080418(-)	promoter region	DLGAP3	DLGAP3
chr11:117203407-117206457	-2.38044	0.000123167	promoter region:FXYD2|NM_021603(-)	promoter region	FXYD2	FXYD2
chr5:242185-245544	-2.37787	0.00012337	promoter region:LRRC14B|NM_001080478(+)	promoter region	LRRC14B	LRRC14B
chr17:70220093-70223143	-2.45992	0.000123499	promoter region:CD300LF|NM_139018(-)	promoter region	CD300LF	CD300LF
chr2:238723923-238724624	-2.41562	0.000123568	within:KLHL30|NM_198582(+)	within	KLHL30
chr17:3421139-3421840	-2.37229	0.000123571	within:TRPV1|NM_080706(-)//TRPV1|NM_080705(-)//TRPV1|NM_018727(-)//TRPV1|NM_080704(-)	within	TRPV1
chr3:88111975-88115025	-2.39058	0.000123705	promoter region:HTR1F|NM_000866(+)	promoter region	HTR1F	HTR1F
chr17:68769004-68772054	-2.37	0.000124063	promoter region:CPSF4L|NM_001129885(-)	promoter region	CPSF4L	CPSF4L
chrX:243871-244571	-2.43345	0.0001241	within:PPP2R3B|NM_013239(-)	within	PPP2R3B
chr21:43729188-43729888	-2.49583	0.000124202	left:C21orf84|NR_026863(6657-)	left	C21orf84
chr7:62678333-62679033	-2.43976	0.000124216	left:LOC643955|NR_003952(276464-)	left	LOC643955
chr19:39914879-39917929	-2.39496	0.000124344	promoter region:ZNF181|NM_001145665(+)//ZNF181|NM_001029997(+)	promoter region	ZNF181	ZNF181
chr1:245341208-245344782	-2.42917	0.000124411	promoter region:C1orf229|NM_207401(-)	promoter region	C1orf229	C1orf229
chr19:63683397-63684098	-2.41229	0.000125356	within:ZNF446|NM_017908(+)	within	ZNF446
chr14:103070415-103071116	-2.35746	0.000125499	within:TRMT61A|NM_152307(+)	within	TRMT61A
chr19:47790312-47793362	-2.4442	0.000126061	promoter region:CEACAM8|NM_001816(-)	promoter region	CEACAM8	CEACAM8
chr19:63527756-63530806	-2.47979	0.000126419	promoter region:ZSCAN22|NM_181846(+)	promoter region	ZSCAN22	ZSCAN22
chr6:168427267-168427967	-2.42202	0.000126691	left:FRMD1|NM_024919(204579-)	left	FRMD1
chr22:18023788-18024488	-2.37543	0.000126752	left:LOC150185|NR_024381(89426-)	left	LOC150185
chr19:4252818-4256200	-2.36417	0.000126997	promoter region:TMIGD2|NM_144615(-)//FSD1|NM_024333(+)	promoter region	TMIGD2	TMIGD2
chr22:35584535-35587585	-2.50874	0.000127404	promoter region:NCF4|NM_013416(+)//NCF4|NM_000631(+)	promoter region	NCF4	NCF4
chr9:139083976-139087289	-2.41308	0.000127785	promoter region:C9orf140|NM_178448(-)	promoter region	C9orf140	C9orf140
chr3:49881741-49884813	-2.34062	0.000127886	promoter region:CAMKV|NM_024046(-)	promoter region	CAMKV	CAMKV
chr7:157102454-157103155	-2.38943	0.000128107	within:PTPRN2|NM_130842(-)//PTPRN2|NM_130843(-)//PTPRN2|NM_002847(-)	within	PTPRN2
chr9:139563689-139567247	-2.39091	0.00012818	promoter region:PNPLA7|NM_001098537(-)//MRPL41|NM_032477(+)//PNPLA7|NM_152286(-)	promoter region	PNPLA7	PNPLA7
chr11:56950489-56954069	-2.41442	0.000128237	promoter region:SLC43A3|NM_017611(-)//SLC43A3|NM_014096(-)//SLC43A3|NM_199329(-)	promoter region	SLC43A3	SLC43A3
chr13:112154091-112154792	-2.40654	0.000128775	left:C13orf28|NM_145248(75422+)	left	C13orf28
chr17:76746226-76746927	-2.35161	0.000129129	within:AATK|NM_001080395(-)	within	AATK
chr10:72100124-72103174	-2.34262	0.000129167	promoter region:ADAMTS14|NM_080722(+)//ADAMTS14|NM_139155(+)	promoter region	ADAMTS14	ADAMTS14
chr3:9007038-9007738	-2.33726	0.000129485	within:SRGAP3|NM_001033117(-)//SRGAP3|NM_014850(-)	within	SRGAP3
chr19:2758224-2759386	-2.35667	0.000129527	within:THOP1|NM_003249(+)	within	THOP1
chr16:88189072-88189772	-2.40907	0.000129601	within:CPNE7|NM_014427(+)//CPNE7|NM_153636(+)	within	CPNE7
chr11:108795644-108798694	-2.35117	0.0001307	promoter region:C11orf87|NM_207645(+)	promoter region	C11orf87	C11orf87
chr15:89163205-89163906	-2.32308	0.000131787	left:BLM|NM_000057(101623+)	left	BLM
chr3:37876232-37879282	-2.45371	0.000131849	promoter region:CTDSPL|NM_005808(+)//CTDSPL|NM_001008392(+)	promoter region	CTDSPL	CTDSPL
chr19:6180854-6181912	-2.50506	0.000132713	within:MLLT1|NM_005934(-)	within	MLLT1
chr16:56494901-56495602	-2.40844	0.000132815	within:CNGB1|NM_001297(-)	within	CNGB1
chr2:241172377-241175508	-2.31505	0.000133077	promoter region:CAPN10|NM_023083(+)//CAPN10|NM_021251(+)//CAPN10|NM_023085(+)//CAPN10|NM_023089(+)	promoter region	CAPN10	CAPN10
chr14:22573584-22576709	2.8101	0.000133365	promoter region:PSMB5|NM_002797(-)//PSMB5|NM_001144932(-)//PSMB5|NM_001130725(-)	promoter region	PSMB5	PSMB5
chr1:2329571-2330271	-2.39738	0.000133441	within:PEX10|NM_002617(-)//PEX10|NM_153818(-)	within	PEX10
chr21:44254193-44257406	2.77137	0.000133981	promoter region:TRAPPC10|NM_003274(+)	promoter region	TRAPPC10	TRAPPC10
chr18:75409062-75409803	-2.35708	0.000135372	left:NFATC1|NM_172389//NFATC1|NM_172387(147749+)	left	NFATC1
chr5:179238483-179239183	-2.61189	0.000135991	within:TBC1D9B|NM_015043(-)//TBC1D9B|NM_198868(-)	within	TBC1D9B
chr11:76861841-76865196	2.79903	0.000136329	promoter region:PAK1|NM_002576(-)//PAK1|NM_001128620(-)	promoter region	PAK1	PAK1
chrX:129864279-129867329	-2.31158	0.000137136	promoter region:ENOX2|NM_182314(-)//ENOX2|NM_006375(-)	promoter region	ENOX2	ENOX2
chr9:135834068-135834769	-2.30135	0.000139689	within:VAV2|NM_001134398(-)//VAV2|NM_003371(-)	within	VAV2
chr22:23331214-23334264	-2.28144	0.000140958	promoter region:GGT1|NM_001032365(+)	promoter region	GGT1	GGT1
chr16:629409-632701	-2.32	0.000143611	promoter region:FAM195A|NM_138418(+)	promoter region	FAM195A	FAM195A
chr16:33047580-33048280	-2.38	0.000143973	left:SLC6A10P|NR_003083(243616-)	left	SLC6A10P
chr19:1875293-1875994	-2.43483	0.000145509	within:SCAMP4|NM_079834(+)	within	SCAMP4
chr8:145262219-145265525	-2.29476	0.000145813	promoter region:C8orf30A|NM_016458(+)	promoter region	C8orf30A	C8orf30A
chr19:18749032-18749969	-2.29271	0.000146029	within:CRTC1|NM_001098482(+)//CRTC1|NM_015321(+)	within	CRTC1
chr11:73855638-73858688	-2.24994	0.000146095	promoter region:KCNE3|NM_005472(-)	promoter region	KCNE3	KCNE3
chr13:112472652-112473353	-2.65054	0.000149534	within:ATP11A|NM_032189(+)//ATP11A|NM_015205(+)	within	ATP11A
chr6:122970635-122973685	2.72733	0.000152396	promoter region:PKIB|NM_032471(+)//PKIB|NM_181795(+)	promoter region	PKIB	PKIB
chr19:60795540-60796783	-2.40875	0.000155179	within:FIZ1|NM_032836(-)	within	FIZ1
chr16:2517735-2518436	-2.27875	0.00015704	within:AMDHD2|NM_015944(+)//AMDHD2|NM_001145815(+)	within	AMDHD2
chr7:5075823-5078873	-2.24958	0.00015982	promoter region:LOC389458|NR_015343(+)	promoter region	LOC389458	LOC389458
chr7:75867350-75868051	-2.25525	0.000161788	within:SRCRB4D|NM_080744(-)//ZP3|NM_007155(+)	within	SRCRB4D
chr7:99364569-99367619	-2.20708	0.000163276	promoter region:GJC3|NM_181538(-)	promoter region	GJC3	GJC3
chr1:111790825-111795793	2.63605	0.000200799	promoter region:ATP5F1|NM_001688(+)//WDR77|NM_024102(-)	promoter region	ATP5F1	ATP5F1
chr1:181825752-181829109	2.58878	0.000224794	promoter region:NCF2|NM_001127651(-)//NCF2|NM_000433(-)	promoter region	NCF2	NCF2
chr6:29469954-29473004	2.62038	0.000226663	promoter region:OR12D2|NM_013936(+)	promoter region	OR12D2	OR12D2
chr4:7825182-7825882	2.58641	0.00022856	within:AFAP1|NM_001134647(-)//AFAP1|NM_198595(-)//AFAP1AS|NR_026892(+)	within	AFAP1
chr13:43257858-43261546	2.61962	0.000230505	promoter region:ENOX1|NM_017993(-)	promoter region	ENOX1	ENOX1
chr7:139122209-139126505	2.6083	0.000231637	promoter region:TBXAS1|NM_001130966(+)//HIPK2|NM_022740(-)//HIPK2|NM_001113239(-)	promoter region	TBXAS1	TBXAS1
chr1:31180600-31183650	2.6674	0.000235506	promoter region:SNORD103A|NR_004054(-)	promoter region	SNORD103A	SNORD103A
chr6:137282654-137287135	-2.3324	0.000301963	promoter region:SLC35D3|NM_001008783(+)	promoter region	SLC35D3	SLC35D3
chr20:60149776-60154309	2.6092	0.000322018	promoter region:SS18L1|NM_198935(+)//PSMA7|NM_002792(-)	promoter region	SS18L1	SS18L1
chr21:10011784-10015231	2.41942	0.000334495	promoter region:TPTE|NM_199261(-)//TPTE|NM_199260(-)//TPTE|NM_199259(-)	promoter region	TPTE	TPTE
chr15:86963090-86966140	2.39713	0.000343956	promoter region:AEN|NM_022767(+)	promoter region	AEN	AEN
chrX:153647556-153650606	2.36962	0.000351586	promoter region:SNORA36A|NR_002969(+)	promoter region	SNORA36A	SNORA36A
chr14:34581423-34585970	2.3718	0.000353095	promoter region:FAM177A1|NM_001079519(+)//FAM177A1|NM_173607(+)	promoter region	FAM177A1	FAM177A1
chr2:97714860-97717910	2.37902	0.000359669	promoter region:ZAP70|NM_207519(+)	promoter region	ZAP70	ZAP70
chr2:237986979-237990029	2.31205	0.000397722	promoter region:COL6A3|NM_057165(-)//COL6A3|NM_057166(-)//COL6A3|NM_004369(-)//COL6A3|NM_057167(-)//COL6A3|NM_057164(-)	promoter region	COL6A3	COL6A3
chr6:169891205-169896003	2.29327	0.000427107	promoter region:C6orf70|NM_018341(+)//TCTE3|NM_174910(-)	promoter region	C6orf70	C6orf70
chr13:44459246-44464053	2.2271	0.000465506	promoter region:NUFIP1|NM_012345(-)//KIAA1704|NM_018559(+)	promoter region	NUFIP1	NUFIP1
chr17:55823758-55826808	-0.516271	0.000548318	promoter region:USP32|NM_032582(-)	promoter region	USP32	USP32
chr7:55379459-55380266	-2.62237	0.0010885	left:EGFR|NM_201283//EGFR|NM_201282//EGFR|NM_201284//EGFR|NM_005228(325241+)	left	EGFR
chr5:142794660-142797710	-0.510264	0.00165391	promoter region:NR3C1|NM_001018077(-)//NR3C1|NM_001018074(-)//NR3C1|NM_001018075(-)	promoter region	NR3C1	NR3C1
chr7:74888921-74889622	-0.596854	0.00204121	within:POM121C|NM_001099415(-)	within	POM121C
chr9:96395286-96398336	-2.46325	0.00246216	promoter region:FBP2|NM_003837(-)	promoter region	FBP2	FBP2
chr11:62097426-62100476	-2.20416	0.00260761	promoter region:EEF1G|NM_001404(-)	promoter region	EEF1G	EEF1G
chr11:129442485-129446008	-2.34475	0.00263672	promoter region:APLP2|NM_001142276(+)//APLP2|NM_001642(+)//APLP2|NM_001142278(+)//APLP2|NR_024515(+)//APLP2|NM_001142277(+)//APLP2|NR_024516(+)	promoter region	APLP2	APLP2
chrX:55041064-55044114	-2.45705	0.00279341	promoter region:APEX2|NM_014481(+)	promoter region	APEX2	APEX2
chr2:10583754-10584454	-2.26875	0.00310351	left:ODC1|NM_002539(77850-)	left	ODC1
chrX:2835192-2835892	-2.24095	0.00334523	within:ARSD|NM_001669(-)	within	ARSD
chr20:59903252-59903953	-2.35913	0.00343105	within:CDH4|NM_001794(+)	within	CDH4
chr8:57394786-57398235	-0.512448	0.00347497	promoter region:SDR16C5|NM_138969(-)	promoter region	SDR16C5	SDR16C5
chr21:45877482-45878832	-1.71683	0.00376086	left:SLC19A1|NM_194255(203435-)	left	SLC19A1
chr17:15628448-15631498	-2.32067	0.00395205	promoter region:MEIS3P1|NR_002211(+)	promoter region	MEIS3P1	MEIS3P1
chr8:965032-965758	-2.23675	0.00401365	left:ERICH1|NM_207332(293806-)	left	ERICH1
chr1:19839872-19844510	-2.21225	0.00407743	promoter region:NBL1|NM_005380(+)//NBL1|NM_182744(+)	promoter region	NBL1	NBL1
chrX:19727228-19730278	-2.27121	0.00431626	promoter region:SH3KBP1|NM_001024666(-)	promoter region	SH3KBP1	SH3KBP1
chr16:1140801-1144625	-2.36875	0.00434653	promoter region:CACNA1H|NM_021098(+)//CACNA1H|NM_001005407(+)	promoter region	CACNA1H	CACNA1H
chr19:3604105-3604806	-2.29896	0.00438137	within:PIP5K1C|NM_012398(-)	within	PIP5K1C
chr13:112540312-112541012	-2.27479	0.00441191	within:ATP11A|NM_032189(+)//ATP11A|NM_015205(+)	within	ATP11A
chr19:53707648-53710698	-2.27913	0.0044872	promoter region:LMTK3|NM_001080434(-)	promoter region	LMTK3	LMTK3
chr2:23705119-23705820	-2.15433	0.00451337	left:APOB|NM_000384(2584669-)	left	APOB
chr20:5242405-5245798	-2.24475	0.00451474	promoter region:PROKR2|NM_144773(-)	promoter region	PROKR2	PROKR2
chr10:133803702-133804402	-2.23962	0.0045169	within:JAKMIP3|NM_001105521(+)	within	JAKMIP3
chr15:82973254-82976304	-2.31717	0.00465508	promoter region:SCAND2|NR_004859(+)//SCAND2|NR_003654(+)	promoter region	SCAND2	SCAND2
chr19:3048328-3049029	-2.15794	0.00466772	within:GNA11|NM_002067(+)	within	GNA11
chr19:1349926-1350627	-2.13819	0.00467959	within:GAMT|NM_000156(-)//GAMT|NM_138924(-)	within	GAMT
chr17:1029126-1032321	-2.25884	0.00472311	promoter region:ABR|NM_021962(-)	promoter region	ABR	ABR
chr16:29103805-29104505	-2.19689	0.00474348	left:RRN3P2|NR_003369(110142+)	left	RRN3P2
chr1_random:343226-343926	-2.30221	0.00475526	left:TAS1R3|NM_152228(76273+)	left	TAS1R3
chr17:78638656-78639357	-2.10075	0.00480344	within:METRNL|NM_001004431(+)	within	METRNL
chr3:49144993-49148043	-2.33719	0.00480565	promoter region:LAMB2|NM_002292(-)	promoter region	LAMB2	LAMB2
chr7:75876338-75879388	-2.10327	0.00482907	promoter region:SRCRB4D|NM_080744(-)	promoter region	SRCRB4D	SRCRB4D
chr17:24062211-24065439	-2.16925	0.00484554	promoter region:PROCA1|NM_152465(-)	promoter region	PROCA1	PROCA1
chr16:87879827-87880528	-2.23285	0.00492282	within:ANKRD11|NM_013275(-)	within	ANKRD11
chr21_random:1592554-1593255	-2.15277	0.004969	left:LOC100132288|NM_001033515(1427884-)	left	LOC100132288
chr4:8639383-8640083	-2.19817	0.00497836	within:GPR78|NM_080819(+)	within	GPR78
chr19:12705919-12709915	-2.31675	0.00502515	promoter region:ASNA1|NM_004317(+)//C19orf43|NM_024038(-)	promoter region	ASNA1	ASNA1
chrX:153135956-153139006	-2.25025	0.00508976	promoter region:OPN1MW|NM_000513(+)//OPN1MW2|NM_001048181(+)	promoter region	OPN1MW	OPN1MW
chr11:49871383-49872084	-2.1391	0.00515194	left:LOC440040|NR_027044(334728+)	left	LOC440040
chr19:59354648-59358311	-2.13493	0.00517651	promoter region:LENG1|NM_024316(-)	promoter region	LENG1	LENG1
chr3:123994150-123997780	-2.4425	0.00522614	promoter region:HSPBAP1|NM_024610(-)//DIRC2|NM_032839(+)	promoter region	HSPBAP1	HSPBAP1
chr21:35015534-35018584	-2.12886	0.00522937	promoter region:NCRNA00160|NR_024351(+)	promoter region	NCRNA00160	NCRNA00160
chr10:99467282-99470332	-2.17826	0.00524075	promoter region:LOC100270710|NR_026754(-)	promoter region	LOC100270710	LOC100270710
chr13:18653326-18656376	-2.31032	0.00524456	promoter region:TUBA3C|NM_006001(-)	promoter region	TUBA3C	TUBA3C
chr19:14537021-14537722	-2.14371	0.00524562	within:TECR|NM_138501(+)	within	TECR
chr1:36391949-36394999	-2.44462	0.00525537	promoter region:MAP7D1|NM_018067(+)	promoter region	MAP7D1	MAP7D1
chr19:12614060-12614760	-2.31983	0.00531094	left:ZNF791|NM_153358(31329+)	left	ZNF791
chr4:132866139-132866839	-2.21525	0.00531516	left:C4orf33|NM_001099783(2629408+)	left	C4orf33
chr17:23961980-23967778	-2.18117	0.00531623	promoter region:SGK494|NR_024395(-)//SGK494|NM_144610(-)	promoter region	SGK494	SGK494
chr5:1106325-1107026	-2.24624	0.00534427	within:SLC12A7|NM_006598(-)	within	SLC12A7
chr9:67898368-67899412	-2.17733	0.00537462	left:ANKRD20A1|NM_032250//ANKRD20A3|NM_001012419(381788+)	left	ANKRD20A1
chr12:131486115-131487318	-2.1458	0.00538523	left:GALNT9|NM_001122636(70137-)	left	GALNT9
chr1:152011951-152015322	-2.20802	0.0054643	promoter region:SLC27A3|NM_024330(+)	promoter region	SLC27A3	SLC27A3
chr11:64246626-64249676	-2.07872	0.00547129	promoter region:NRXN2|NM_138732(-)//NRXN2|NM_015080(-)	promoter region	NRXN2	NRXN2
chr5:180593624-180594325	-1.94355	0.0054783	within:TRIM41|NM_201627(+)//TRIM41|NM_033549(+)	within	TRIM41
chr5:17328153-17329240	-2.16303	0.00554991	within:BASP1|NM_006317(+)	within	BASP1
chr17:1784123-1784823	-2.1567	0.00555486	left:RPA1|NM_002945(104101+)	left	RPA1
chr9:139480815-139481515	-2.14329	0.0055919	within:PNPLA7|NM_152286(-)//PNPLA7|NM_001098537(-)	within	PNPLA7
chr9:136671032-136674218	-2.22682	0.00563609	promoter region:COL5A1|NM_000093(+)	promoter region	COL5A1	COL5A1
chr19:4588089-4591139	-2.25267	0.00564871	promoter region:TNFAIP8L1|NM_152362(+)	promoter region	TNFAIP8L1	TNFAIP8L1
chr1:49136949-49137649	2.2059	0.00566194	within:AGBL4|NM_032785(-)	within	AGBL4
chr10:115426484-115430186	-2.26667	0.00571744	promoter region:CASP7|NM_001227(+)//CASP7|NM_033338(+)//CASP7|NM_033340(+)//CASP7|NM_033339(+)	promoter region	CASP7	CASP7
chr19:63776013-63779194	-2.232	0.00577962	promoter region:MGC2752|NR_026052(+)//MZF1|NM_003422(-)//MZF1|NM_198055(-)	promoter region	MGC2752	MGC2752
chr14:104356142-104359192	-2.11376	0.00577988	promoter region:MGC23270|NR_024396(+)	promoter region	MGC23270	MGC23270
chr14:60855827-60859220	-2.22967	0.00581424	promoter region:PRKCH|NM_006255(+)	promoter region	PRKCH	PRKCH
chr19:17304963-17305663	-2.09721	0.00581873	within:ANO8|NM_020959(-)	within	ANO8
chr16:87983609-87984310	-2.12913	0.00583025	within:ANKRD11|NM_013275(-)	within	ANKRD11
chrX:102417846-102420896	-2.10786	0.00583135	promoter region:TCEAL5|NM_001012979(-)	promoter region	TCEAL5	TCEAL5
chr6:37427285-37430620	-2.28433	0.00584702	promoter region:RNF8|NM_003958(+)//RNF8|NM_183078(+)	promoter region	RNF8	RNF8
chr3:198179491-198182541	-2.14505	0.00585708	promoter region:PIGZ|NM_025163(-)	promoter region	PIGZ	PIGZ
chrX:139909981-139913031	-2.21475	0.00586445	promoter region:SPANXB1|NM_032461(+)//SPANXF1|NM_139019(+)//SPANXB2|NM_145664(+)	promoter region	SPANXB1	SPANXB1
chr3:75916335-75919385	-2.21224	0.00588315	promoter region:ZNF717|NM_001128223(-)	promoter region	ZNF717	ZNF717
chr2:242167721-242168422	-2.37487	0.00588592	left:BOK|NM_032515(20857+)	left	BOK
chr9:138514624-138515325	-1.87021	0.00589349	within:NOTCH1|NM_017617(-)	within	NOTCH1
chrY:170277-173327	-2.1781	0.0058986	promoter region:GTPBP6|NM_012227(-)	promoter region	GTPBP6	GTPBP6
chr7:2055913-2056613	-2.21657	0.0059178	within:MAD1L1|NM_003550(-)//MAD1L1|NM_001013837(-)//MAD1L1|NM_001013836(-)	within	MAD1L1
chr16:1527442-1528142	-2.12607	0.00592057	within:IFT140|NM_014714(-)//TMEM204|NM_024600(+)	within	IFT140
chrX:47814842-47817892	-2.24138	0.00593562	promoter region:ZNF630|NM_001037735(-)	promoter region	ZNF630	ZNF630
chr1:16842215-16845265	-2.12383	0.00595264	promoter region:MST1P2|NR_027504(+)	promoter region	MST1P2	MST1P2
chr20:36985928-36989249	-2.20242	0.00595989	promoter region:FAM83D|NM_030919(+)	promoter region	FAM83D	FAM83D
chr15:65202667-65205717	-2.135	0.00596337	promoter region:SMAD3|NM_001145102(+)	promoter region	SMAD3	SMAD3
chr1:154372213-154372913	-2.09643	0.00598783	within:LMNA|NM_005572(+)//LMNA|NM_170707(+)//LMNA|NM_170708(+)	within	LMNA
chr7:6757824-6760874	-2.106	0.00599205	promoter region:RSPH10B|NM_173565(+)//RSPH10B2|NM_001099697(+)	promoter region	RSPH10B	RSPH10B
chr2:241640924-241641625	-2.10325	0.00600635	within:SNED1|NM_001080437(+)	within	SNED1
chr19:60017264-60020314	-2.123	0.00601528	promoter region:KIR3DL1|NM_013289(+)	promoter region	KIR3DL1	KIR3DL1
chr19:5945594-5946295	-2.0849	0.0060359	within:RFX2|NM_000635(-)//RFX2|NM_134433(-)	within	RFX2
chr16:84076384-84077084	-2.14688	0.00603769	left:FAM92B|NM_198491(372769-)	left	FAM92B
chr7:44004573-44007623	-2.14583	0.00603968	promoter region:SPDYE1|NM_175064(+)	promoter region	SPDYE1	SPDYE1
chr6:66473229-66476279	-2.1425	0.00604377	promoter region:EYS|NM_001142801(-)//EYS|NM_001142800(-)	promoter region	EYS	EYS
chr22:48268880-48269581	-2.1945	0.00604534	left:FAM19A5|NM_015381(918099+)	left	FAM19A5
chr2:79073550-79074250	-2.10858	0.00604979	left:SNAR-H|NR_024342(1037890-)	left	SNAR-H
chr11:64459326-64462376	-2.07625	0.00606992	promoter region:GPHA2|NM_130769(-)	promoter region	GPHA2	GPHA2
chr17_random:114182-117232	-2.12358	0.00607035	promoter region:MGC70870|NR_003682(+)	promoter region	MGC70870	MGC70870
chr19:45006525-45007225	-2.09786	0.00607036	left:LEUTX|NM_001143832(47452+)	left	LEUTX
chr21:14141946-14144996	-2.08104	0.0060782	promoter region:C21orf15|NR_026755(-)	promoter region	C21orf15	C21orf15
chr18:14324981-14328031	-2.07063	0.0060848	promoter region:LOC284233|NR_026756(+)	promoter region	LOC284233	LOC284233
chr9:91185560-91186261	-2.0635	0.00608917	within:SEMA4D|NM_006378(-)//SEMA4D|NM_001142287(-)	within	SEMA4D
chr19:42586094-42586794	-2.06457	0.00609006	left:ZNF527|NM_032453(32196+)	left	ZNF527
chr7:101775282-101775983	-2.08417	0.00609165	within:SPDYE6|NM_001146210(-)	within	SPDYE6
chr14:95184827-95187877	-2.23401	0.00609995	promoter region:TCL6|NM_020554(+)//TCL6|NM_020553(+)	promoter region	TCL6	TCL6
chr20:60322174-60322875	-2.10121	0.00611199	within:LAMA5|NM_005560(-)	within	LAMA5
chr6:32154582-32155283	-2.05214	0.0061198	within:TNXB|NM_019105(-)	within	TNXB
chr16:844193-844894	-2.20012	0.00612784	within:LMF1|NM_022773(-)	within	LMF1
chr15:77168859-77172710	-2.06292	0.00614043	promoter region:RASGRF1|NM_002891(-)//RASGRF1|NM_001145648(-)	promoter region	RASGRF1	RASGRF1
chr4:3711673-3712373	-2.23117	0.00615113	left:LRPAP1|NM_002337(207651-)	left	LRPAP1
chr20:34877315-34878016	-2.23235	0.00616413	within:C20orf117|NM_199181(-)	within	C20orf117
chr10:101978724-101981774	2.01048	0.00617933	promoter region:CHUK|NM_001278(-)	promoter region	CHUK	CHUK
chr4:1293312-1294013	-2.04656	0.00619312	within:MAEA|NM_005882(+)//MAEA|NM_001017405(+)	within	MAEA
chr2:127902353-127903054	-2.07466	0.00619766	within:PROC|NM_000312(+)	within	PROC
chr22:22975148-22978198	-2.03885	0.00619902	promoter region:POM121L9P|NR_003714(+)	promoter region	POM121L9P	POM121L9P
chr1:153442673-153446754	-2.06536	0.00620239	promoter region:MTX1|NM_002455(+)//THBS3|NM_007112(-)//MTX1|NM_198883(+)	promoter region	MTX1	MTX1
chr19:6721281-6724331	-2.08438	0.0062025	promoter region:VAV1|NM_005428(+)	promoter region	VAV1	VAV1
chrX:109130577-109133627	-2.11262	0.00620469	promoter region:TMEM164|NM_032227(+)	promoter region	TMEM164	TMEM164
chr5:1904103-1904803	-2.17317	0.00620592	left:NDUFS6|NM_004553(49595+)	left	NDUFS6
chr19:7502602-7507008	-2.02875	0.00621252	promoter region:PNPLA6|NM_006702(+)	promoter region	PNPLA6	PNPLA6
chr16:87064306-87065007	-2.02417	0.00622741	within:ZFPM1|NM_153813(+)	within	ZFPM1
chr2:16709967-16713017	-2.04375	0.00623774	promoter region:FAM49A|NM_030797(-)	promoter region	FAM49A	FAM49A
chr1:146568550-146571600	-2.04167	0.00623819	promoter region:PPIAL4E|NM_001144032(-)	promoter region	PPIAL4E	PPIAL4E
chr1:219123883-219124583	-2.2617	0.00623847	within:HLX|NM_021958(+)	within	HLX
chr20:58002383-58005433	-2.01833	0.006242	promoter region:CDH26|NM_021810(+)	promoter region	CDH26	CDH26
chr10:50401722-50404772	2.12897	0.00624261	promoter region:PGBD3|NM_170753(-)	promoter region	PGBD3	PGBD3
chr19:10294786-10295486	-2.09833	0.00624302	within:RAVER1|NM_133452(-)	within	RAVER1
chr11:48858032-48858732	-2.02567	0.00624351	left:OR4A47|NM_001005512(391112+)	left	OR4A47
chr7:5326930-5327631	-2.10696	0.00624393	within:TNRC18|NM_001080495(-)	within	TNRC18
chr22:49239455-49240155	-2.08265	0.00624685	within:SBF1|NM_002972(-)	within	SBF1
chrX:106402339-106403039	-2.02964	0.00624862	left:CXorf41|NM_173494(65822+)	left	CXorf41
chr19:56018245-56021295	-2.02517	0.00625603	promoter region:KLK1|NM_002257(-)	promoter region	KLK1	KLK1
chr19:3911761-3912461	-2.17029	0.00626569	within:DAPK3|NM_001348(-)	within	DAPK3
chr22:31182763-31185813	-2.05058	0.00626728	promoter region:BPIL2|NM_174932(-)	promoter region	BPIL2	BPIL2
chr3:184362751-184365801	-2.07925	0.00627823	promoter region:LAMP3|NM_014398(-)	promoter region	LAMP3	LAMP3
chr17:1609568-1612618	-2.04773	0.00628519	promoter region:SERPINF1|NM_002615(+)	promoter region	SERPINF1	SERPINF1
chr10:134569756-134570456	-2.0375	0.00628543	within:C10orf92|NM_017609(-)	within	C10orf92
chr19:44956633-44959683	-2.19906	0.00628741	promoter region:LEUTX|NM_001143832(+)	promoter region	LEUTX	LEUTX
chr20:59979172-59980178	-2.00333	0.00629297	left:CDH4|NM_001794(718219+)	left	CDH4
chr16:1303805-1304506	-2.01573	0.00631006	within:UBE2I|NM_194261(+)//UBE2I|NM_194260(+)//UBE2I|NM_003345(+)//UBE2I|NM_194259(+)	within	UBE2I
chr8:145951165-145954215	-2.07775	0.00631606	promoter region:ZNF251|NM_138367(-)	promoter region	ZNF251	ZNF251
chr19:11420820-11421520	-2.00625	0.00631774	within:PRKCSH|NM_001001329(+)//PRKCSH|NM_002743(+)	within	PRKCSH
chr19:2015709-2016409	-2.015	0.00631915	left:MKNK2|NM_199054//MKNK2|NM_017572(13466-)	left	MKNK2
chr22:48555392-48556092	-2.00917	0.00632158	within:BRD1|NM_014577(-)	within	BRD1
chr19:6467366-6468066	-2.01179	0.00633071	left:TUBB4|NM_006087(14036-)	left	TUBB4
chr19:8117775-8120867	-1.99625	0.00633123	promoter region:FBN3|NM_032447(-)	promoter region	FBN3	FBN3
chr4:132883560-132884261	-1.99438	0.00633867	left:C4orf33|NM_001099783(2646829+)	left	C4orf33
chr22:41935694-41936395	-1.99854	0.00634163	within:SCUBE1|NM_173050(-)	within	SCUBE1
chr12:51475549-51478599	-2.0375	0.00634194	promoter region:KRT3|NM_057088(-)	promoter region	KRT3	KRT3
chr7:155590674-155591374	-2.19914	0.00634657	left:SHH|NM_000193(292946-)	left	SHH
chr22:41834260-41837554	-2.185	0.00634669	promoter region:BIK|NM_001197(+)	promoter region	BIK	BIK
chr12:124144071-124144771	-2.12814	0.00635075	within:AACS|NM_023928(+)	within	AACS
chr1:152430623-152433673	-1.98667	0.0063517	promoter region:TPM3|NM_152263(-)	promoter region	TPM3	TPM3
chr17:77777141-77784042	-2.0211	0.00635268	promoter region:SLC16A3|NM_001042423(+)//SLC16A3|NM_001042422(+)//SLC16A3|NM_004207(+)	promoter region	SLC16A3	SLC16A3
chr22:14580078-14580778	-1.98464	0.00636224	left:	left	left:
chr2:70382112-70385164	-1.98457	0.00636818	promoter region:FAM136A|NM_032822(-)	promoter region	FAM136A	FAM136A
chr16:1440075-1440776	-1.98646	0.00637157	within:CLCN7|NM_001287(-)//CLCN7|NM_001114331(-)	within	CLCN7
chr11:76975887-76979039	2.392	0.00637161	promoter region:AQP11|NM_173039(+)	promoter region	AQP11	AQP11
chr9:114875066-114875767	-1.98375	0.00637293	left:ZFP37|NM_003408(16249-)	left	ZFP37
chr10:5969779-5976964	-1.98198	0.00637737	promoter region:FBXO18|NM_032807(+)//ANKRD16|NM_001009943(-)//FBXO18|NM_178150(+)//ANKRD16|NM_001009941(-)//ANKRD16|NM_001009942(-)//ANKRD16|NM_019046(-)	promoter region	FBXO18	FBXO18
chr20:61529592-61530293	-2.025	0.00637838	within:KCNQ2|NM_172106(-)//KCNQ2|NM_172107(-)//KCNQ2|NM_172108(-)//KCNQ2|NM_004518(-)	within	KCNQ2
chr7:75408596-75411646	-1.99562	0.00638461	promoter region:SNORA14A|NR_002955(+)	promoter region	SNORA14A	SNORA14A
chr19:15021574-15024624	-1.9985	0.00640168	promoter region:CASP14|NM_012114(+)	promoter region	CASP14	CASP14
chr16:2093206-2093907	-1.97442	0.00640494	within:PKD1|NM_000296(-)//PKD1|NM_001009944(-)	within	PKD1
chr7:6170502-6171202	-1.976	0.00640946	within:CYTH3|NM_004227(-)	within	CYTH3
chr16:2612575-2613276	-2.2422	0.00641191	within:LOC652276|NR_015441(+)	within	LOC652276
chr17:36436370-36439420	-1.98354	0.0064126	promoter region:KRTAP1-5|NM_031957(-)	promoter region	KRTAP1-5	KRTAP1-5
chr7:5380153-5380854	-2.07981	0.00641752	within:TNRC18|NM_001080495(-)	within	TNRC18
chr5:1798342-1799043	-1.97473	0.00642226	left:LOC728613|NR_003713(111222-)	left	LOC728613
chr19:5044199-5044899	-2.06831	0.00642462	within:KDM4B|NM_015015(+)	within	KDM4B
chr5:918129-918830	-1.97844	0.00642501	within:BRD9|NM_023924(-)//BRD9|NM_001009877(-)	within	BRD9
chr10:133869278-133869978	-1.97508	0.00642509	left:DPYSL4|NM_006426(18875+)	left	DPYSL4
chr1:149296334-149301189	-2.00333	0.00642824	promoter region:CDC42SE1|NM_001038707(-)//CDC42SE1|NM_020239(-)//MLLT11|NM_006818(+)	promoter region	CDC42SE1	CDC42SE1
chr2:238812331-238815860	-1.96604	0.00643725	promoter region:HES6|NM_018645(-)//HES6|NM_001142853(-)	promoter region	HES6	HES6
chrX:148520640-148523815	-1.97625	0.00644604	promoter region:TMEM185A|NM_032508(-)	promoter region	TMEM185A	TMEM185A
chr12:51886657-51889707	-2.12037	0.00645156	promoter region:ITGB7|NM_000889(-)	promoter region	ITGB7	ITGB7
chr1:38946896-38947597	-1.97463	0.00645228	left:POU3F1|NM_002699(661859-)	left	POU3F1
chrX:308271-309097	-2.0054	0.00645481	left:PPP2R3B|NM_013239(40644-)	left	PPP2R3B
chr16:80269190-80269890	-2.0069	0.00645728	within:CMIP|NM_198390(+)//CMIP|NM_030629(+)	within	CMIP
chr19:55091349-55094399	-1.9725	0.00645759	promoter region:IL4I1|NM_152899(-)	promoter region	IL4I1	IL4I1
chr20:36506270-36512035	-2.05896	0.0064589	promoter region:SNORA39|NR_002972(+)//SNHG11|NR_003239(+)//SNORA60|NR_002986(+)	promoter region	SNORA39	SNORA39
chr10:102744514-102749788	-2.0105	0.00646197	promoter region:LZTS2|NM_032429(+)	promoter region	LZTS2	LZTS2
chr10:2553739-2555222	-1.97167	0.00646441	left:ADARB2|NM_018702(784021-)	left	ADARB2
chr11:122212024-122215074	-1.95708	0.0064689	promoter region:CRTAM|NM_019604(+)	promoter region	CRTAM	CRTAM
chr22:41953111-41953812	-1.9675	0.00647757	within:SCUBE1|NM_173050(-)	within	SCUBE1
chrX:70852525-70853225	-1.96857	0.00647828	within:CXorf49|NM_001145140(-)//CXorf49B|NM_001145139(-)	within	CXorf49
chr18:75294251-75294952	-1.95575	0.00648163	within:NFATC1|NM_172390(+)//NFATC1|NM_172388(+)//NFATC1|NM_006162(+)//NFATC1|NM_172387(+)//NFATC1|NM_172389(+)	within	NFATC1
chr6:168984539-168985239	-2.01029	0.00648228	left:SMOC2|NM_022138(399660+)	left	SMOC2
chr11:95160849-95165042	2.39973	0.00648275	promoter region:CEP57|NM_014679(+)//FAM76B|NM_144664(-)	promoter region	CEP57	CEP57
chr22:40524183-40527233	-2.00422	0.00648479	promoter region:CCDC134|NM_024821(+)	promoter region	CCDC134	CCDC134
chr19:44522507-44525718	-1.95842	0.00648859	promoter region:SAMD4B|NM_018028(+)	promoter region	SAMD4B	SAMD4B
chr3:49178179-49181229	-2.27117	0.00649137	promoter region:CCDC71|NM_022903(-)	promoter region	CCDC71	CCDC71
chr20:44239794-44240494	-1.9747	0.00649422	within:CDH22|NM_021248(-)	within	CDH22
chrX:72350799-72353849	-1.95397	0.0064946	promoter region:NAP1L2|NM_021963(-)	promoter region	NAP1L2	NAP1L2
chr17:4966511-4969561	-1.96605	0.00649725	promoter region:ZNF232|NM_014519(-)	promoter region	ZNF232	ZNF232
chr5:553150-553850	-2.05323	0.00649785	within:SLC9A3|NM_004174(-)	within	SLC9A3
chr9:138465222-138465923	-1.985	0.00649902	within:SEC16A|NM_014866(-)	within	SEC16A
chr19:2147687-2148387	-1.99464	0.00649976	within:DOT1L|NM_032482(+)	within	DOT1L
chrX:152937879-152940976	-1.96363	0.00650066	promoter region:IRAK1|NM_001025242(-)//IRAK1|NM_001025243(-)//IRAK1|NM_001569(-)	promoter region	IRAK1	IRAK1
chr17:4810913-4814296	-1.96605	0.00650213	promoter region:SPAG7|NM_004890(-)	promoter region	SPAG7	SPAG7
chr4:8740614-8741315	-1.97433	0.00650654	left:CPZ|NM_001014447//CPZ|NM_003652//CPZ|NM_001014448(95280+)	left	CPZ
chr3:52784207-52787257	-2.02271	0.00650776	promoter region:ITIH1|NM_002215(+)	promoter region	ITIH1	ITIH1
chr6:132898679-132901729	-1.961	0.00650791	promoter region:TAAR9|NM_175057(+)	promoter region	TAAR9	TAAR9
chr19:7645502-7648552	-1.94733	0.00650971	promoter region:C19orf59|NM_174918(+)	promoter region	C19orf59	C19orf59
chr2:130613374-130614075	-1.96353	0.00652155	within:CCDC74B|NM_207310(-)	within	CCDC74B
chr1:2293777-2294478	-1.96521	0.0065226	within:MORN1|NM_024848(-)	within	MORN1
chr1:6218021-6221071	-1.97139	0.00652785	promoter region:ICMT|NM_012405(-)	promoter region	ICMT	ICMT
chr6:169804442-169805142	-2.17712	0.00652991	within:WDR27|NM_182552(-)	within	WDR27
chrX:48262667-48265717	-1.9585	0.00653305	promoter region:EBP|NM_006579(+)	promoter region	EBP	EBP
chr9:130836633-130839683	-1.94944	0.0065401	promoter region:FAM73B|NM_032809(+)	promoter region	FAM73B	FAM73B
chr16:28864385-28865086	-1.99664	0.00654746	left:CD19|NM_001770(13625+)	left	CD19
chr19:6836141-6839191	-1.94875	0.00654757	promoter region:EMR1|NM_001974(+)	promoter region	EMR1	EMR1
chr20:50134555-50135256	-2.19394	0.00655129	within:ZFP64|NM_199427(-)	within	ZFP64
chr17:71143668-71146718	-1.96151	0.00655165	promoter region:LOC643008|NR_015452(+)	promoter region	LOC643008	LOC643008
chr13:113327785-113328485	-1.94267	0.00655416	within:TFDP1|NR_026580(+)//TFDP1|NM_007111(+)	within	TFDP1
chr19:3648693-3649393	-1.97258	0.00656295	within:PIP5K1C|NM_012398(-)	within	PIP5K1C
chr16:28457386-28460436	-1.93638	0.00656653	promoter region:NUPR1|NM_012385(-)//NUPR1|NM_001042483(-)	promoter region	NUPR1	NUPR1
chr1:16957998-16959561	-1.9381	0.00657132	within:MST1P9|NR_002729(-)	within	MST1P9
chr19:54994751-54995451	-1.93952	0.00657453	within:AP2A1|NM_130787(+)//AP2A1|NM_014203(+)	within	AP2A1
chr12:131369432-131370133	-2.06552	0.00657958	within:GALNT9|NM_001122636(-)	within	GALNT9
chr6:166959952-166963156	-1.94521	0.00658029	promoter region:RPS6KA2|NM_021135(-)	promoter region	RPS6KA2	RPS6KA2
chr21:45192273-45192974	-1.93	0.00658039	within:C21orf70|NM_058190(+)	within	C21orf70
chr17:36633985-36637035	-1.93567	0.00658103	promoter region:KRTAP9-2|NM_031961(+)	promoter region	KRTAP9-2	KRTAP9-2
chr1:152562219-152567509	-1.93406	0.00658331	promoter region:ATP8B2|NM_020452(+)//ATP8B2|NM_001005855(+)	promoter region	ATP8B2	ATP8B2
chr2:238861336-238864386	-1.93133	0.00658469	promoter region:PER2|NM_022817(-)	promoter region	PER2	PER2
chr15:28649609-28652878	-2.12203	0.00659116	promoter region:FAM7A1|NR_026858(+)//FAM7A2|NR_027470(+)	promoter region	FAM7A1	FAM7A1
chr11:966721-967421	-1.93917	0.00659217	within:AP2A2|NM_012305(+)	within	AP2A2
chr16:87772940-87773641	-1.93353	0.00659589	within:CDH15|NM_004933(+)	within	CDH15
chr14:104339319-104340019	-1.92893	0.00659795	within:ZBTB42|NM_001137601(+)	within	ZBTB42
chr16:848343-849738	-1.93271	0.00660227	within:LMF1|NM_022773(-)	within	LMF1
chr2:176677452-176680939	-1.92312	0.0066162	promoter region:HOXD11|NM_021192(+)	promoter region	HOXD11	HOXD11
chr11:62170070-62173120	-2.15248	0.00661941	promoter region:GANAB|NM_198335(-)//GANAB|NM_198334(-)	promoter region	GANAB	GANAB
chr9:114864329-114865030	-1.92208	0.00662244	left:ZFP37|NM_003408(5512-)	left	ZFP37
chr4:191172919-191173993	-1.92142	0.00662403	left:TUBB4Q|NM_020040(29901-)	left	TUBB4Q
chr4:117739673-117740374	-1.92094	0.00662672	left:NDST4|NM_022569(1485192-)	left	NDST4
chr6:132063624-132066674	-1.93033	0.00662744	promoter region:OR2A4|NM_030908(-)	promoter region	OR2A4	OR2A4
chr17:78150505-78151205	-1.93264	0.00662959	within:FOXK2|NM_004514(+)	within	FOXK2
chr22:40269800-40272865	-2.23579	0.00663547	promoter region:POLR3H|NM_001018052(-)//POLR3H|NM_001018050(-)//POLR3H|NM_138338(-)	promoter region	POLR3H	POLR3H
chr7:73339300-73342350	-1.9525	0.00664082	promoter region:CLIP2|NM_003388(+)//CLIP2|NM_032421(+)	promoter region	CLIP2	CLIP2
chr16:87570292-87573342	-2.04272	0.00664202	promoter region:CBFA2T3|NM_005187(-)	promoter region	CBFA2T3	CBFA2T3
chr6:39977317-39978018	-1.93404	0.00664271	within:DAAM2|NM_015345(+)	within	DAAM2
chr9:34369429-34374038	-2.12092	0.00664415	promoter region:C9orf24|NM_147168(-)//C9orf24|NM_147169(-)	promoter region	C9orf24	C9orf24
chr19:55155631-55158681	-1.95621	0.00665046	promoter region:SIGLEC11|NM_001135163(-)//SIGLEC11|NM_052884(-)	promoter region	SIGLEC11	SIGLEC11
chr7:63289881-63290581	-1.9225	0.00665248	left:LOC643955|NR_003952(888012-)	left	LOC643955
chr1:1167559-1168259	-1.92614	0.00665264	left:B3GALT6|NM_080605(10068+)	left	B3GALT6
chr22:41301597-41302297	-1.91333	0.00665632	within:RRP7B|NR_002184(-)	within	RRP7B
chr17:77634197-77635479	-1.9215	0.0066605	within:FASN|NM_004104(-)	within	FASN
chr7:73427956-73428656	-2.01585	0.00666237	within:CLIP2|NM_032421(+)//CLIP2|NM_003388(+)	within	CLIP2
chr11:124112598-124115681	-1.91143	0.00666528	promoter region:NRGN|NM_006176(+)//NRGN|NM_001126181(+)	promoter region	NRGN	NRGN
chr22:49219930-49220630	-1.91225	0.00666863	within:PPP6R2|NM_014678(+)	within	PPP6R2
chr12:131347268-131347969	-1.90982	0.00667194	within:GALNT9|NM_001122636(-)	within	GALNT9
chr7:157216918-157219502	-2.17881	0.00667369	within:PTPRN2|NM_130842(-)//PTPRN2|NM_130843(-)//PTPRN2|NM_002847(-)	within	PTPRN2
chr1:84992416-84993116	-1.94598	0.00667706	left:SSX2IP|NM_014021(63648-)	left	SSX2IP
chr14:105306335-105307036	-1.90844	0.0066782	left:TMEM121|NM_025268(242338+)	left	TMEM121
chr12:131395213-131395913	-1.9105	0.0066828	within:GALNT9|NM_001122636(-)	within	GALNT9
chr22:44922722-44926076	-1.9172	0.00668751	promoter region:PPARA|NM_001001928(+)//PPARA|NM_005036(+)	promoter region	PPARA	PPARA
chr11:57091146-57094469	-1.93705	0.00668819	promoter region:UBE2L6|NM_198183(-)//UBE2L6|NM_004223(-)	promoter region	UBE2L6	UBE2L6
chr19:8526293-8526993	-1.98425	0.0066938	within:MYO1F|NM_012335(-)	within	MYO1F
chr6:32224537-32225238	-1.90944	0.00669481	within:PRRT1|NM_030651(-)	within	PRRT1
chr5:135554955-135559190	-1.98309	0.00670063	promoter region:LOC389332|NR_024418(-)	promoter region	LOC389332	LOC389332
chr9:135090427-135091127	-1.91321	0.00670192	left:OBP2B|NM_014581(15978-)	left	OBP2B
chr16:88540211-88543687	-1.9435	0.00670407	promoter region:DEF8|NM_017702(+)//DEF8|NM_207514(+)	promoter region	DEF8	DEF8
chr7:4724095-4724796	-2.10994	0.00670446	within:FOXK1|NM_001037165(+)	within	FOXK1
chr20:61742735-61744416	-1.90748	0.00670687	within:STMN3|NM_015894(-)	within	STMN3
chr15_random:613587-614288	-1.9175	0.00670834	left:GOLGA8F|NM_001012452(355282+)	left	GOLGA8F
chrY:145087-145788	-1.9222	0.00670878	within:PLCXD1|NM_018390(+)	within	PLCXD1
chr11:779516-782566	-1.91133	0.00671233	promoter region:CEND1|NM_016564(-)	promoter region	CEND1	CEND1
chr12:51469739-51470439	-1.9183	0.00671621	within:KRT3|NM_057088(-)	within	KRT3
chr19:5290640-5294254	-2.21339	0.00671753	promoter region:PTPRS|NM_130854(-)//PTPRS|NM_002850(-)//PTPRS|NM_130853(-)//PTPRS|NM_130855(-)	promoter region	PTPRS	PTPRS
chr1:149162998-149166058	-1.90625	0.00671885	promoter region:SETDB1|NR_026977(+)//SETDB1|NM_001145415(+)//SETDB1|NM_012432(+)	promoter region	SETDB1	SETDB1
chr19:13743816-13746866	-1.9165	0.00672226	promoter region:C19orf53|NM_014047(+)	promoter region	C19orf53	C19orf53
chr17:59312345-59315395	-1.90512	0.00672637	promoter region:GH2|NM_022558(-)//GH2|NM_022557(-)//GH2|NM_022556(-)//GH2|NM_002059(-)	promoter region	GH2	GH2
chrX:70667217-70670267	-1.90411	0.00673203	promoter region:OGT|NM_181673(+)//OGT|NM_181672(+)	promoter region	OGT	OGT
chr1:153542722-153545938	-1.91917	0.00674222	promoter region:FDPS|NM_001135822(+)//FDPS|NM_002004(+)//FDPS|NM_001135821(+)	promoter region	FDPS	FDPS
chr6:31571393-31574443	-1.92188	0.0067431	promoter region:MICB|NM_005931(+)	promoter region	MICB	MICB
chr19:21915259-21915959	-2.13843	0.00674517	left:ZNF43|NM_003423(104449-)	left	ZNF43
chr17:59341740-59344790	-2.1388	0.00674524	promoter region:CSHL1|NM_022581(-)//CSHL1|NM_022580(-)//CSHL1|NM_001318(-)//CSHL1|NM_022579(-)	promoter region	CSHL1	CSHL1
chrX:46887134-46891993	-2.0357	0.00674732	promoter region:NDUFB11|NM_001135998(-)//NDUFB11|NM_019056(-)//NDUFB11|NR_024235(-)//RBM10|NM_005676(+)//RBM10|NM_152856(+)//NDUFB11|NR_024234(-)	promoter region	NDUFB11	NDUFB11
chr11:474870-475620	-2.09702	0.0067501	within:PTDSS2|NM_030783(+)	within	PTDSS2
chr10:116035573-116036273	-1.91175	0.00675376	within:VWA2|NM_198496(+)	within	VWA2
chr7:158011482-158012182	-2.13252	0.0067574	within:PTPRN2|NM_130842(-)//PTPRN2|NM_130843(-)//PTPRN2|NM_002847(-)	within	PTPRN2
chr2:218960420-218961120	-1.89161	0.00676634	within:SLC11A1|NM_000578(+)	within	SLC11A1
chr1:16846072-16847632	-1.89857	0.0067706	within:MST1P2|NR_027504(+)	within	MST1P2
chr19:46901929-46904979	-1.90625	0.00677101	promoter region:CEACAM5|NM_004363(+)	promoter region	CEACAM5	CEACAM5
chr6:464079-466338	-1.88938	0.00677226	within:EXOC2|NM_018303(-)	within	EXOC2
chr6:44332651-44335701	-1.95938	0.00677249	promoter region:SLC35B2|NM_178148(-)	promoter region	SLC35B2	SLC35B2
chr11:913400-916450	-1.90639	0.00677543	promoter region:AP2A2|NM_012305(+)	promoter region	AP2A2	AP2A2
chr13:110470164-110470864	-1.90458	0.00677567	left:ANKRD10|NM_017664(104747-)	left	ANKRD10
chr19:5285802-5286503	-1.89086	0.00678069	within:PTPRS|NM_130853(-)//PTPRS|NM_130854(-)//PTPRS|NM_002850(-)//PTPRS|NM_130855(-)	within	PTPRS
chr22:41239705-41240405	-1.89042	0.00678337	within:RRP7A|NM_015703(-)	within	RRP7A
chr7:44330957-44334195	-1.90901	0.00678801	promoter region:CAMK2B|NM_172078(-)//CAMK2B|NM_172081(-)//CAMK2B|NM_001220(-)//CAMK2B|NM_172084(-)//CAMK2B|NM_172083(-)//CAMK2B|NM_172079(-)//CAMK2B|NM_172082(-)//CAMK2B|NM_172080(-)	promoter region	CAMK2B	CAMK2B
chr16:1364976-1365677	-1.90696	0.00678957	within:UNKL|NM_023076(-)	within	UNKL
chr3:53007654-53008355	-2.10725	0.00679158	within:SFMBT1|NM_016329(-)//SFMBT1|NM_001005158(-)//SFMBT1|NM_001005159(-)	within	SFMBT1
chr17:73932848-73933549	-1.89208	0.0067923	left:PGS1|NM_024419(46519+)	left	PGS1
chr9:137810193-137810894	-2.15928	0.0067925	within:KCNT1|NM_020822(+)	within	KCNT1
chr6:170371513-170372597	-1.96873	0.00680081	left:NCRNA00242|NR_026781(430667-)	left	NCRNA00242
chr6:7206117-7206817	-1.88952	0.00680261	left:RREB1|NM_001003699//RREB1|NM_001003698(152931+)	left	RREB1
chr19:7527600-7528301	-1.99009	0.00680693	within:PNPLA6|NM_006702(+)	within	PNPLA6
chr19:8106859-8107559	-2.03965	0.00680711	within:FBN3|NM_032447(-)	within	FBN3
chr9:45332308-45333008	-1.88	0.00680982	left:FAM27C|NR_027421(402077+)	left	FAM27C
chr6:37037614-37038314	-1.89458	0.00681066	within:PI16|NM_153370(+)	within	PI16
chr12:46641156-46644517	-1.92875	0.00681115
chr19:8469441-8470225	-1.95179	0.00681138	within:PRAM1|NM_032152(-)	within	PRAM1
chr20:61876907-61877623	-1.91064	0.00681311	within:ZBTB46|NM_025224(-)	within	ZBTB46
chr17:958464-961514	-1.88136	0.00681531	promoter region:ABR|NM_001092(-)	promoter region	ABR	ABR
chr7:148432142-148433007	-1.88183	0.00681829	within:ZNF425|NM_001001661(-)	within	ZNF425
chr2:241554130-241554831	-2.06075	0.00681987	left:C2orf54|NM_001085437(69884-)	left	C2orf54
chr20:59889493-59890194	-1.89781	0.00682008	within:CDH4|NM_001794(+)	within	CDH4
chr1:47427748-47430798	-1.87897	0.00682299	promoter region:PDZK1IP1|NM_005764(-)	promoter region	PDZK1IP1	PDZK1IP1
chr1:141560167-141560868	-2.19096	0.00682394	left:EMBP1|NR_003955(20597735+)	left	EMBP1
chrX:48100476-48103526	-1.87774	0.00682423	promoter region:SSX3|NM_021014(-)//SSX3|NM_175711(-)	promoter region	SSX3	SSX3
chr17:71398541-71399242	-1.88736	0.00682719	within:TRIM65|NM_173547(-)	within	TRIM65
chr12:107237959-107241009	-1.89117	0.00683828	promoter region:CMKLR1|NM_001142345(-)	promoter region	CMKLR1	CMKLR1
chr18:72735693-72736394	-2.10506	0.00683834	within:ZNF236|NM_007345(+)	within	ZNF236
chr17:7309496-7310197	-1.87417	0.00683897	within:ZBTB4|NM_001128833(-)//ZBTB4|NM_020899(-)	within	ZBTB4
chr12:8270871-8273921	-1.89125	0.00684248	promoter region:FAM90A1|NM_018088(-)	promoter region	FAM90A1	FAM90A1
chr16:31290183-31290884	-2.13079	0.00684731	within:ITGAX|NM_000887(+)	within	ITGAX
chr19:8580978-8584028	-1.89	0.00684887	promoter region:ADAMTS10|NM_030957(-)	promoter region	ADAMTS10	ADAMTS10
chrY:243871-244571	-1.90593	0.00684933	within:PPP2R3B|NM_013239(-)	within	PPP2R3B
chr1:226575931-226576631	-2.1351	0.00685005	within:OBSCN|NM_052843(+)//OBSCN|NM_001098623(+)	within	OBSCN
chr2:231822523-231823223	-2.19036	0.00685306	within:ARMC9|NM_025139(+)	within	ARMC9
chr1:1016014-1016714	-1.89142	0.00685348	within:C1orf159|NM_017891(-)	within	C1orf159
chr1:2221973-2222674	-1.8705	0.00685692	within:SKI|NM_003036(+)	within	SKI
chr15:43280055-43283105	-1.879	0.00685975	promoter region:SHF|NM_138356(-)	promoter region	SHF	SHF
chr7:73390667-73391367	-1.88564	0.0068635	within:CLIP2|NM_032421(+)//CLIP2|NM_003388(+)	within	CLIP2
chr11:17757377-17758078	-2.14583	0.00687216	within:KCNC1|NM_001112741(+)	within	KCNC1
chr1:231188304-231189005	-1.9202	0.0068724	within:PCNXL2|NM_014801(-)	within	PCNXL2
chr14:99864627-99865913	-1.88191	0.00687425	within:SLC25A47|NM_207117(+)	within	SLC25A47
chr22:19268877-19269578	-1.86906	0.00687464	within:MED15|NM_001003891(+)//MED15|NM_015889(+)	within	MED15
chr19:5958677-5959377	-1.87365	0.00688232	within:RFX2|NM_000635(-)//RFX2|NM_134433(-)	within	RFX2
chr7:151456858-151457608	-1.9317	0.00689051	left:GALNT11|NM_022087(103148+)	left	GALNT11
chrX:151877807-151878508	-1.8825	0.00689651	within:ZNF185|NM_007150(+)	within	ZNF185
chr10:88767595-88770645	-1.86421	0.00690118	promoter region:FAM25A|NM_001146157(+)	promoter region	FAM25A	FAM25A
chr7:72784894-72787944	-1.86861	0.00690216	promoter region:WBSCR26|NR_026690(+)	promoter region	WBSCR26	WBSCR26
chr7:5377006-5377707	-1.86884	0.00690237	within:TNRC18|NM_001080495(-)	within	TNRC18
chr9:138523718-138524419	-1.87062	0.00690756	within:NOTCH1|NM_017617(-)	within	NOTCH1
chr7:43116282-43119865	-1.89667	0.00690953	promoter region:HECW1|NM_015052(+)	promoter region	HECW1	HECW1
chr14:23966540-23971011	-1.86862	0.00691092	promoter region:CBLN3|NM_001039771(-)//KHNYN|NM_015299(+)	promoter region	CBLN3	CBLN3
chr15:98912043-98917016	-1.98925	0.00691381	left:LASS3|NM_178842(9595-)	left	LASS3
chr14:105404401-105405101	-1.85858	0.00691799	left:TMEM121|NM_025268(340404+)	left	TMEM121
chr15:75111344-75112045	-1.94479	0.00691871	within:PSTPIP1|NM_003978(+)	within	PSTPIP1
chr22:44057112-44060162	-1.8735	0.00692141	promoter region:UPK3A|NM_006953(+)	promoter region	UPK3A	UPK3A
chr7:1458050-1458750	-1.85796	0.00692204	within:MICALL2|NM_182924(-)	within	MICALL2
chr2:209781928-209782629	-1.85671	0.00692372	left:PTH2R|NM_005048(802128+)	left	PTH2R
chr22:48436584-48439634	-2.12465	0.00692378	promoter region:C22orf34|NR_026997(-)	promoter region	C22orf34	C22orf34
chr5:1296442-1297143	-1.87	0.00692686	within:SLC6A18|NM_182632(+)	within	SLC6A18
chr17:76870386-76871087	-1.85604	0.00693065	within:SLC38A10|NM_001037984(-)//SLC38A10|NM_138570(-)	within	SLC38A10
chr18:75732306-75733007	-1.85729	0.00693169	within:KCNG2|NM_012283(+)	within	KCNG2
chr5:1576025-1579516	-1.87833	0.00693722	promoter region:LPCAT1|NM_024830(-)	promoter region	LPCAT1	LPCAT1
chr7:30915552-30918602	-1.85902	0.00693865	promoter region:AQP1|NM_198098(+)	promoter region	AQP1	AQP1
chr10:47865227-47868277	-1.85831	0.00694235	promoter region:FAM25G|NM_001137549(+)//FAM25C|NM_001137548(+)//FAM25B|NM_001137556(+)	promoter region	FAM25G	FAM25G
chr17:69954305-69955006	-1.855	0.00694244	within:GPRC5C|NM_022036(+)//GPRC5C|NM_018653(+)	within	GPRC5C
chr19:2066172-2066872	-2.05433	0.00694448	within:AP3D1|NM_001077523(-)//AP3D1|NM_003938(-)	within	AP3D1
chr16:86913035-86913736	-1.87839	0.00695025	left:BANP|NM_079837//BANP|NM_017869(370497+)	left	BANP
chr22:49390502-49391203	-1.89949	0.00695165	within:MAPK8IP2|NM_016431(+)//MAPK8IP2|NM_012324(+)	within	MAPK8IP2
chr13:31424777-31425478	-2.04221	0.00695199	within:EEF1DP3|NR_027062(+)	within	EEF1DP3
chr19:2750383-2751084	-1.85774	0.00695263	within:THOP1|NM_003249(+)	within	THOP1
chr22:21850111-21854465	-1.85423	0.00695306	promoter region:BCR|NM_004327(+)//BCR|NM_021574(+)	promoter region	BCR	BCR
chr16:87309307-87310018	-1.85563	0.00695636	within:FAM38A|NM_001142864(-)	within	FAM38A
chr17_random:2330705-2331405	-1.8975	0.00695714	left:GCGR|NM_000160(10243+)	left	GCGR
chr19:58713548-58716946	-1.85296	0.00695919	promoter region:ZNF331|NM_018555(+)	promoter region	ZNF331	ZNF331
chr1:31812232-31815282	-1.87553	0.00695945	promoter region:TINAGL1|NM_022164(+)	promoter region	TINAGL1	TINAGL1
chr19:2475950-2476650	-1.87107	0.00696278	within:GNG7|NM_052847(-)	within	GNG7
chr20:29868398-29871448	-1.85184	0.00696497	promoter region:MYLK2|NM_033118(+)	promoter region	MYLK2	MYLK2
chr16:30124239-30128189	-1.8545	0.00696554	promoter region:LOC388242|NR_002556(-)//LOC613038|NR_002557(-)	promoter region	LOC388242	LOC388242
chr6:31476909-31479959	-1.85007	0.00696599	promoter region:MICA|NM_000247(+)	promoter region	MICA	MICA
chr16:87275033-87275734	-1.84893	0.00697	within:SNAI3|NM_178310(-)//MGC23284|NR_024399(+)	within	SNAI3
chrX:100527258-100533213	-2.3	0.0069788	promoter region:BTK|NM_000061(-)//RPL36A|NM_021029(+)	promoter region	BTK	BTK
chr2:65134558-65137673	-1.88375	0.00698838	promoter region:CEP68|NM_015147(+)	promoter region	CEP68	CEP68
chr5:160297601-160300651	-1.95458	0.00698939	promoter region:LOC285629|NR_027111(-)	promoter region	LOC285629	LOC285629
chrY:1497660-1498360	-1.85029	0.00699144	within:ASMTL|NM_004192(-)	within	ASMTL
chr11:63827179-63830490	-1.92833	0.00699319	promoter region:ESRRA|NM_004451(+)	promoter region	ESRRA	ESRRA
chr16:67289333-67290033	-1.8919	0.00699389	within:CDH3|NM_001793(+)	within	CDH3
chr1:226540212-226540912	-1.88048	0.00699754	within:OBSCN|NM_052843(+)//OBSCN|NM_001098623(+)	within	OBSCN
chr19:2067339-2068040	-1.84925	0.00699774	within:AP3D1|NM_001077523(-)//AP3D1|NM_003938(-)	within	AP3D1
chr5:132019323-132022373	-1.85443	0.00700017	promoter region:IL13|NM_002188(+)	promoter region	IL13	IL13
chr17:35502607-35503308	-1.84783	0.00700054	within:NR1D1|NM_021724(-)//THRA|NM_003250(+)	within	NR1D1
chr19:18733834-18734534	-1.87262	0.00700061	within:CRTC1|NM_001098482(+)//CRTC1|NM_015321(+)	within	CRTC1
chr7:1465025-1468075	-1.84937	0.007001	promoter region:MICALL2|NM_182924(-)	promoter region	MICALL2	MICALL2
chr12:13042202-13046928	-1.89625	0.00700151	promoter region:HTR7P1|NR_002774(+)//HEBP1|NM_015987(-)	promoter region	HTR7P1	HTR7P1
chr11:819284-823561	-1.85221	0.00700223	promoter region:CD151|NM_004357(+)//CD151|NM_139029(+)//CD151|NM_139030(+)//CD151|NM_001039490(+)	promoter region	CD151	CD151
chr4:132873600-132874300	-2.19492	0.007004	left:C4orf33|NM_001099783(2636869+)	left	C4orf33
chr16:87029730-87031841	-1.8625	0.0070066	within:ZNF469|NM_001127464(+)	within	ZNF469
chr16:73842181-73845444	-1.92268	0.00700755	promoter region:BCAR1|NM_014567(-)	promoter region	BCAR1	BCAR1
chr10:134931897-134932598	-1.84396	0.00700903	within:ADAM8|NM_001109(-)	within	ADAM8
chr1:25101051-25101751	-2.07192	0.00701015	within:RUNX3|NM_004350(-)//RUNX3|NM_001031680(-)	within	RUNX3
chr2:62784064-62788145	2.31611	0.00701107	promoter region:EHBP1|NM_015252(+)//EHBP1|NM_001142614(+)//EHBP1|NM_001142616(+)	promoter region	EHBP1	EHBP1
chr22:48792572-48796264	-1.85808	0.00701225	promoter region:IL17REL|NM_001001694(-)	promoter region	IL17REL	IL17REL
chrX:46932702-46938754	-1.89696	0.007015	promoter region:UBA1|NM_153280(+)//UBA1|NM_003334(+)	promoter region	UBA1	UBA1
chr19:8372728-8373428	-1.83917	0.00701623	within:RAB11B|NM_004218(+)	within	RAB11B
chrX:46974817-46978250	-1.87231	0.00701642	promoter region:USP11|NM_004651(+)	promoter region	USP11	USP11
chrX:100759037-100762087	-1.85333	0.00701652	promoter region:ARMCX6|NM_001009584(-)//ARMCX6|NM_019007(-)	promoter region	ARMCX6	ARMCX6
chr21:45501899-45502600	-1.8575	0.00701803	left:ADARB1|NM_001145407//ADARB1|NM_001033049//ADARB1|NM_001112//ADARB1|NM_015834//ADARB1|NM_015833(182957+)	left	ADARB1
chr22:23356441-23359491	-1.92437	0.00702328	promoter region:LOC644165|NR_024494(+)	promoter region	LOC644165	LOC644165
chr20:3096597-3099647	-2.07079	0.00702516	promoter region:ProSAPiP1|NM_014731(-)	promoter region	ProSAPiP1	ProSAPiP1
chr11:64836466-64839909	-1.845	0.00702751	promoter region:CDC42EP2|NM_006779(+)	promoter region	CDC42EP2	CDC42EP2
chr19:40462809-40465859	-1.84164	0.00702958	promoter region:HAMP|NM_021175(+)	promoter region	HAMP	HAMP
chr21:46635318-46636019	-2.126	0.00703232	within:PCNT|NM_006031(+)	within	PCNT
chr19:38261185-38264235	-1.94675	0.00703534	promoter region:GPATCH1|NM_018025(+)	promoter region	GPATCH1	GPATCH1
chr10:46601084-46604134	-1.83818	0.00703869	promoter region:FAM25B|NM_001137556(-)//FAM25C|NM_001137548(-)//FAM25G|NM_001137549(-)	promoter region	FAM25B	FAM25B
chr22:16647759-16648459	-1.83958	0.00703901	left:BID|NM_001196//BID|NM_197967(10501-)	left	BID
chr4:8696497-8697198	-1.86239	0.0070391	left:CPZ|NM_001014447//CPZ|NM_003652//CPZ|NM_001014448(51163+)	left	CPZ
chr16:23557867-23562619	-1.84625	0.00704017	promoter region:DCTN5|NM_032486(+)//PALB2|NM_024675(-)	promoter region	DCTN5	DCTN5
chrX:82647484-82651118	-1.86896	0.00704171	promoter region:POU3F4|NM_000307(+)	promoter region	POU3F4	POU3F4
chr19:54031136-54034186	-1.84896	0.00704199	promoter region:HSD17B14|NM_016246(-)	promoter region	HSD17B14	HSD17B14
chr9:99498902-99501952	-2.08436	0.00704353	promoter region:XPA|NR_027302(-)//XPA|NM_000380(-)	promoter region	XPA	XPA
chr17:32029697-32032903	-1.83413	0.0070439	promoter region:MRM1|NM_024864(+)	promoter region	MRM1	MRM1
chr14:20281498-20284548	-1.87958	0.00704641	promoter region:EDDM3A|NM_006683(+)	promoter region	EDDM3A	EDDM3A
chr7:1015198-1015899	-1.84219	0.0070485	within:C7orf50|NM_001134395(-)//C7orf50|NM_001134396(-)//C7orf50|NM_032350(-)	within	C7orf50
chr17:38409854-38412904	-2.19225	0.007051	promoter region:IFI35|NM_005533(+)	promoter region	IFI35	IFI35
chr1:1358331-1361381	-1.83233	0.00705101	promoter region:VWA1|NM_199121(+)//VWA1|NM_022834(+)	promoter region	VWA1	VWA1
chrX:64688131-64688918	-1.83835	0.00705478	left:LAS1L|NM_031206(16739-)	left	LAS1L
chr1:202595057-202598107	-1.86062	0.00705638	promoter region:PLEKHA6|NM_014935(-)	promoter region	PLEKHA6	PLEKHA6
chr8:27505474-27506174	-1.83173	0.00705889	left:EPHX2|NM_001979(100913+)	left	EPHX2
chr19:50347133-50351390	-1.85256	0.00706078	promoter region:NKPD1|NM_198478(-)	promoter region	NKPD1	NKPD1
chr10:51454358-51455058	-1.83214	0.00706432	left:AGAP6|NM_001077665(36275+)	left	AGAP6
chr16:65748951-65757489	-1.8705	0.00706706	promoter region:FBXL8|NM_018378(+)//HSF4|NM_001040667(+)//HSF4|NM_001538(+)//TRADD|NM_003789(-)	promoter region	FBXL8	FBXL8
chr3:52322934-52325984	-1.84499	0.00706832	promoter region:DNAH1|NM_015512(+)	promoter region	DNAH1	DNAH1
chr7:158405237-158405938	-1.89248	0.00707046	within:WDR60|NM_018051(+)	within	WDR60
chr15:72889806-72892856	-1.8439	0.00707258	promoter region:LMAN1L|NM_021819(+)	promoter region	LMAN1L	LMAN1L
chr9:114692267-114695454	-1.855	0.00707539	promoter region:SLC46A2|NM_033051(-)	promoter region	SLC46A2	SLC46A2
chr16:83964596-83965296	-2.04833	0.00707553	left:FAM92B|NM_198491(260981-)	left	FAM92B
chr19:50590719-50592155	-1.841	0.00707734	within:PPP1R13L|NM_001142502(-)//PPP1R13L|NM_006663(-)	within	PPP1R13L
chr16:12647-13347	-1.83657	0.00708008	left:	left	left:
chr12:116077559-116078259	-1.83708	0.00708316	within:FBXO21|NM_015002(-)//FBXO21|NM_033624(-)	within	FBXO21
chr3:52843650-52846700	-1.83006	0.00708507	promoter region:MUSTN1|NM_205853(-)	promoter region	MUSTN1	MUSTN1
chr8:1126161-1126861	2.21871	0.00708656	left:ERICH1|NM_207332(454935-)	left	ERICH1
chr11:76514517-76517573	-1.82608	0.00708662	promoter region:MYO7A|NM_001127180(+)//MYO7A|NM_001127179(+)//MYO7A|NM_000260(+)	promoter region	MYO7A	MYO7A
chr19:63765225-63766567	-1.87	0.00708749	within:MZF1|NM_003422(-)//MZF1|NM_198055(-)//LOC100131691|NR_027334(+)	within	MZF1
chr16:29384890-29388840	-1.83288	0.00708826	promoter region:LOC388242|NR_002556(-)//LOC613038|NR_002557(-)	promoter region	LOC388242	LOC388242
chr16:65774774-65777824	-1.84183	0.00708886	promoter region:KIAA0895L|NM_001040715(-)	promoter region	KIAA0895L	KIAA0895L
chr4:154436003-154436704	-1.82698	0.00708975	within:TRIM2|NM_015271(+)//TRIM2|NM_001130067(+)	within	TRIM2
chr1:245017101-245020151	-1.86792	0.00708996	promoter region:LOC149134|NR_015422(+)	promoter region	LOC149134	LOC149134
chr11:66578424-66581474	-1.86029	0.00709002	promoter region:RHOD|NM_014578(+)	promoter region	RHOD	RHOD
chr17:17653636-17655181	-2.19518	0.00709048	within:RAI1|NM_030665(+)	within	RAI1
chr1:43835850-43836550	-1.9456	0.00709428	within:PTPRF|NM_002840(+)//PTPRF|NM_130440(+)	within	PTPRF
chr8:67252642-67255692	-1.9375	0.00709991	promoter region:CRH|NM_000756(-)	promoter region	CRH	CRH
chr7:149040640-149043690	-2.1387	0.00710145	promoter region:KRBA1|NM_032534(+)	promoter region	KRBA1	KRBA1
chr7:1670387-1677043	-1.82957	0.00710207	left:TFAMP1|NR_001288(49756+)	left	TFAMP1
chr2:23766593-23767294	-1.83875	0.00710257	left:APOB|NM_000384(2646143-)	left	APOB
chr1:159325399-159328449	-2.03078	0.00710467	promoter region:PVRL4|NM_030916(-)	promoter region	PVRL4	PVRL4
chr4:1312284-1312985	-1.86167	0.00710581	within:MAEA|NM_005882(+)//MAEA|NM_001017405(+)	within	MAEA
chr4:1199629-1200329	-1.83693	0.00710959	within:CTBP1|NM_001012614(-)//CTBP1|NM_001328(-)	within	CTBP1
chr15:38971479-38974529	-1.99929	0.00711255	promoter region:VPS18|NM_020857(+)	promoter region	VPS18	VPS18
chr12:6743361-6747184	-1.88104	0.00711517	promoter region:PTMS|NM_002824(+)	promoter region	PTMS	PTMS
chr22:20065222-20070181	-1.8325	0.00711529	promoter region:RIMBP3C|NM_001128633(+)//RIMBP3B|NM_001128635(+)	promoter region	RIMBP3C	RIMBP3C
chr1:19076291-19076991	-1.84381	0.0071157	within:ALDH4A1|NM_170726(-)//ALDH4A1|NM_003748(-)	within	ALDH4A1
chr17:73736545-73740190	-2.15924	0.00711783	promoter region:LOC283999|NM_001145529(+)	promoter region	LOC283999	LOC283999
chr21:45181942-45186696	-1.89607	0.00711871	promoter region:C21orf67|NR_027128(-)//C21orf70|NM_058190(+)//C21orf67|NR_027129(-)	promoter region	C21orf67	C21orf67
chr16:18480325-18483375	-1.85813	0.00711951	promoter region:NOMO2|NM_173614(-)//NOMO2|NM_001004060(-)	promoter region	NOMO2	NOMO2
chr8:37724069-37727119	-2.19508	0.00712055	promoter region:LOC728024|NR_003671(-)	promoter region	LOC728024	LOC728024
chr16:87152078-87152778	-1.96	0.00712256	left:ZFPM1|NM_153813(104564+)	left	ZFPM1
chr1:226428839-226429540	-1.84292	0.00712439	within:C1orf69|NM_001010867(+)	within	C1orf69
chr19:49902711-49903411	-1.83274	0.00712513	within:CEACAM16|NM_001039213(+)	within	CEACAM16
chr16:1433287-1436931	-1.82625	0.0071262	promoter region:CCDC154|NM_001143980(-)	promoter region	CCDC154	CCDC154
chr6:151704173-151704874	-1.86281	0.00713154	within:AKAP12|NM_144497(+)//AKAP12|NM_005100(+)	within	AKAP12
chr2:231625472-231626173	-1.83042	0.00713374	left:C2orf72|NM_001144994(14948+)	left	C2orf72
chr19:40478246-40478947	-1.8175	0.00713712	within:MAG|NM_080600(+)//MAG|NM_002361(+)	within	MAG
chr19:10287081-10290131	-1.8575	0.00713998	promoter region:FDX1L|NM_001031734(-)	promoter region	FDX1L	FDX1L
chr17:23922220-23925454	-1.83737	0.00714008	promoter region:PIGS|NM_033198(-)	promoter region	PIGS	PIGS
chr19:2150673-2151374	-1.82667	0.00714079	within:DOT1L|NM_032482(+)	within	DOT1L
chr17:7414340-7424139	-1.81613	0.00714378	promoter region:SNORA48|NR_002918(+)//CD68|NM_001040059(+)//CD68|NM_001251(+)//EIF4A1|NM_001416(+)//SNORA67|NR_002912(+)//SNORD10|NR_002604(+)	promoter region	SNORA48	SNORA48
chr10:51582430-51583130	-1.82181	0.00715356	left:FAM21B|NM_018232(74539+)	left	FAM21B
chr17:37373105-37374228	-2.04393	0.00715421	within:CNP|NM_033133(+)	within	CNP
chr19:63588007-63591057	-1.82488	0.00715553	promoter region:RPS5|NM_001009(+)	promoter region	RPS5	RPS5
chr9:138558862-138562499	-1.83969	0.00715673	promoter region:NOTCH1|NM_017617(-)	promoter region	NOTCH1	NOTCH1
chr7:951939-952639	-1.82881	0.0071586	within:ADAP1|NM_006869(-)	within	ADAP1
chr19:965075-965776	-1.8205	0.00716045	within:C19orf6|NM_001033026(-)//C19orf6|NM_033420(-)	within	C19orf6
chr21:45546772-45547473	-1.83969	0.00716154	left:LOC642852|NR_026943(14378+)	left	LOC642852
chr17:3797322-3798023	-1.83771	0.00716454	within:ATP2A3|NM_174953(-)//ATP2A3|NM_174957(-)//ATP2A3|NM_174958(-)//ATP2A3|NM_174955(-)//ATP2A3|NM_174956(-)//ATP2A3|NM_174954(-)//ATP2A3|NM_005173(-)	within	ATP2A3
chr3:127718674-127721724	-1.82467	0.00716736	promoter region:UROC1|NM_144639(-)	promoter region	UROC1	UROC1
chr16:11975662-11978712	-1.95625	0.00717804	promoter region:RUNDC2A|NM_032167(+)	promoter region	RUNDC2A	RUNDC2A
chr20:60916418-60919468	-1.87862	0.00718042	promoter region:COL9A3|NM_001853(+)	promoter region	COL9A3	COL9A3
chr1:10686924-10687624	-1.8533	0.00718097	within:CASZ1|NM_001079843(-)//CASZ1|NM_017766(-)	within	CASZ1
chr19:47327860-47330910	-1.8784	0.0071813	promoter region:POU2F2|NM_002698(-)	promoter region	POU2F2	POU2F2
chr4:52405236-52405937	-1.82799	0.00718397	within:DCUN1D4|NM_001040402(+)//DCUN1D4|NM_015115(+)	within	DCUN1D4
chr17:77385605-77388655	-2.11567	0.00718413	promoter region:DYSFIP1|NM_001007533(-)	promoter region	DYSFIP1	DYSFIP1
chr11:1084946-1085920	2.20507	0.00718564	within:MUC2|NM_002457(+)	within	MUC2
chr2:219628270-219628970	-1.83083	0.00718844	within:IHH|NM_002181(-)	within	IHH
chr7:313363-314063	-1.8153	0.00719256	left:FAM20C|NM_020223(25312+)	left	FAM20C
chr22:48964046-48967353	-1.80802	0.00719316	promoter region:TRABD|NM_025204(+)	promoter region	TRABD	TRABD
chr5:132034831-132037881	-2.12225	0.00719401	promoter region:IL4|NM_172348(+)//IL4|NM_000589(+)	promoter region	IL4	IL4
chr17:22115682-22116382	-1.82881	0.00719555	left:FLJ36000|NR_027084(287494+)	left	FLJ36000
chr3:129697899-129699592	-1.81883	0.00719645	left:GATA2|NM_032638(3179-)	left	GATA2
chr19:354401-355102	-1.8205	0.00719744	left:THEG|NM_016585//THEG|NM_199202(27392-)	left	THEG
chr3:198151450-198156301	-2.192	0.00720046	promoter region:NCBP2|NM_007362(-)//LOC152217|NR_024388(+)//NCBP2|NM_001042540(-)	promoter region	NCBP2	NCBP2
chr9:126945008-126948058	-1.84725	0.00720202	promoter region:SCAI|NM_001144877(-)//SCAI|NM_173690(-)	promoter region	SCAI	SCAI
chr19:15450705-15453755	-1.83833	0.00720371	promoter region:PGLYRP2|NM_052890(-)	promoter region	PGLYRP2	PGLYRP2
chr19:13119841-13125924	-1.87133	0.00720596	promoter region:IER2|NM_004907(+)//STX10|NM_003765(-)	promoter region	IER2	IER2
chr3:50201606-50204656	-2.03809	0.00720821	promoter region:GNAT1|NM_000172(+)//GNAT1|NM_144499(+)	promoter region	GNAT1	GNAT1
chr15:39972957-39976007	-2.11279	0.00721026	promoter region:SPTBN5|NM_016642(-)	promoter region	SPTBN5	SPTBN5
chr8:145638137-145638838	-1.80454	0.00721093	within:NFKBIL2|NM_013432(-)	within	NFKBIL2
chr2:121758536-121761688	2.20183	0.00721234	promoter region:TFCP2L1|NM_014553(-)	promoter region	TFCP2L1	TFCP2L1
chr16:1085635-1088685	-1.85	0.00721331	promoter region:C1QTNF8|NM_207419(-)	promoter region	C1QTNF8	C1QTNF8
chr20:43176607-43179657	-1.85125	0.00721501	promoter region:WFDC5|NM_145652(-)	promoter region	WFDC5	WFDC5
chr19:18127435-18128136	-1.83431	0.00721601	within:PIK3R2|NM_005027(+)	within	PIK3R2
chr9:139430715-139432278	-1.84675	0.00721608	within:EXD3|NM_017820(-)	within	EXD3
chr11:2906364-2909666	-1.8395	0.00721627	promoter region:PHLDA2|NM_003311(-)	promoter region	PHLDA2	PHLDA2
chr7:149724569-149726162	-1.80583	0.00721999	within:ZNF775|NM_173680(+)	within	ZNF775
chr11:16991419-16994975	-1.80937	0.00722147	promoter region:PLEKHA7|NM_175058(-)	promoter region	PLEKHA7	PLEKHA7
chr11:116203393-116206443	-1.84702	0.00722697	promoter region:APOC3|NM_000040(+)	promoter region	APOC3	APOC3
chr21:32594431-32595131	-2.10981	0.0072278	within:MRAP|NM_206898(+)//MRAP|NM_178817(+)	within	MRAP
chr16:859638-860339	-1.80262	0.00722826	within:LMF1|NM_022773(-)	within	LMF1
chr22:17335586-17338721	-1.83071	0.00722993	promoter region:DGCR5|NR_002733(+)	promoter region	DGCR5	DGCR5
chr10:134399389-134400090	-1.80425	0.00723128	within:INPP5A|NM_005539(+)	within	INPP5A
chr16:86451613-86452314	-1.82473	0.00723614	within:SLC7A5|NM_003486(-)	within	SLC7A5
chr22:29393262-29396312	-1.82533	0.00723812	promoter region:DUSP18|NM_152511(-)	promoter region	DUSP18	DUSP18
chr6:149240052-149241227	-2.05533	0.00723911	within:UST|NM_005715(+)	within	UST
chr19:45087516-45088216	-1.8246	0.00724287	within:FCGBP|NM_003890(-)	within	FCGBP
chr8:145526150-145533863	-2.06045	0.00724412	promoter region:SCRT1|NM_031309(-)	promoter region	SCRT1	SCRT1
chr17:4281527-4284577	-2.05518	0.00724442	promoter region:SPNS3|NM_182538(+)	promoter region	SPNS3	SPNS3
chr8:145709292-145709992	-1.80121	0.00724757	within:RECQL4|NM_004260(-)	within	RECQL4
chr16:2143359-2147547	-2.12522	0.00724795	promoter region:TRAF7|NM_032271(+)//SNORD60|NR_002736(-)	promoter region	TRAF7	TRAF7
chr1:1131342-1134392	-1.80506	0.00724823	promoter region:TNFRSF18|NM_148902(-)//TNFRSF18|NM_004195(-)//TNFRSF18|NM_148901(-)	promoter region	TNFRSF18	TNFRSF18
chr20:60345157-60345857	-2.07569	0.00725004	within:LAMA5|NM_005560(-)	within	LAMA5
chr17:36928186-36931236	-2.10533	0.00725178	promoter region:KRT15|NM_002275(-)	promoter region	KRT15	KRT15
chr9:139025609-139026310	-1.82242	0.00725282	within:ABCA2|NM_212533(-)//ABCA2|NM_001606(-)	within	ABCA2
chr9:35607814-35610864	-2.14674	0.00725777	promoter region:CD72|NM_001782(-)	promoter region	CD72	CD72
chr16:73309954-73310655	-1.8275	0.00726232	within:FA2H|NM_024306(-)	within	FA2H
chr19:2564682-2565383	-1.85661	0.00726511	within:GNG7|NM_052847(-)	within	GNG7
chrX:152725518-152726219	-1.85939	0.00727097	within:PDZD4|NM_032512(-)	within	PDZD4
chr9:35661474-35664524	-2.04154	0.00727112	promoter region:CA9|NM_001216(+)	promoter region	CA9	CA9
chr19:59452369-59455419	-1.82351	0.00727188	promoter region:LILRB5|NM_001081443(-)//LILRB5|NM_006840(-)//LILRB5|NM_001081442(-)	promoter region	LILRB5	LILRB5
chr19:11477031-11480094	-1.7975	0.00727243	promoter region:ZNF653|NM_138783(-)	promoter region	ZNF653	ZNF653
chr19:62784999-62788049	-2.13564	0.00727657	promoter region:ZIK1|NM_001010879(+)	promoter region	ZIK1	ZIK1
chr3:47025490-47028645	-1.80431	0.00728065	promoter region:NRADDP|NR_024046(+)	promoter region	NRADDP	NRADDP
chr11:63410210-63413260	-1.82722	0.00728082	promoter region:MARK2|NM_017490(+)//MARK2|NM_004954(+)	promoter region	MARK2	MARK2
chr9:137207663-137208363	-1.79283	0.00728571	left:OLFM1|NM_006334(100740+)	left	OLFM1
chr16:87763223-87766273	-2.03326	0.00729058	promoter region:CDH15|NM_004933(+)	promoter region	CDH15	CDH15
chr12:110232318-110233018	-1.79583	0.00729483	within:CUX2|NM_015267(+)	within	CUX2
chr17:36657024-36660074	-1.81208	0.00729498	promoter region:KRTAP9-4|NM_033191(+)	promoter region	KRTAP9-4	KRTAP9-4
chr20:61652376-61656117	-1.79631	0.00729577	promoter region:C20orf195|NM_024059(+)	promoter region	C20orf195	C20orf195
chr19:53875294-53875995	-1.79812	0.00729678	within:SEC1|NR_004401(+)	within	SEC1
chr8:37677085-37678045	-1.80733	0.00729779	left:ZNF703|NM_025069(4627+)	left	ZNF703
chr1:150064567-150067617	-1.79896	0.00729793	promoter region:RORC|NM_001001523(-)	promoter region	RORC	RORC
chr3:48673339-48677792	-1.79229	0.00729903	promoter region:CELSR3|NM_001407(-)	promoter region	CELSR3	CELSR3
chr1:4626231-4626932	-1.8025	0.00730069	within:AJAP1|NM_001042478(+)//AJAP1|NM_018836(+)	within	AJAP1
chr19:5092917-5093617	-1.86475	0.00730122	within:KDM4B|NM_015015(+)	within	KDM4B
chr19:17720895-17723945	-1.79767	0.00730217	promoter region:FCHO1|NM_015122(+)	promoter region	FCHO1	FCHO1
chr16:1191511-1192211	-1.924	0.0073023	within:CACNA1H|NM_021098(+)//CACNA1H|NM_001005407(+)	within	CACNA1H
chr16:82586734-82587434	-1.79807	0.00730421	within:NECAB2|NM_019065(+)	within	NECAB2
chr9:138646721-138647497	-1.80337	0.00730535	left:NOTCH1|NM_017617(86662-)	left	NOTCH1
chr7:100630412-100633462	-1.79479	0.00730644	promoter region:MOGAT3|NM_178176(-)	promoter region	MOGAT3	MOGAT3
chr10:102974172-102981147	-1.7875	0.00730845	promoter region:LBX1|NM_006562(-)	promoter region	LBX1	LBX1
chr9:135922352-135925402	-1.79585	0.00730855	promoter region:BRD3|NM_007371(-)	promoter region	BRD3	BRD3
chr3:110021880-110024930	2.14421	0.00731281	promoter region:TRAT1|NM_016388(+)	promoter region	TRAT1	TRAT1
chr16:547982-551179	-1.7877	0.0073133	promoter region:C16orf11|NM_145270(+)	promoter region	C16orf11	C16orf11
chr8:143642024-143642725	-1.79089	0.00731601	left:BAI1|NM_001702(99646+)	left	BAI1
chr16:85122760-85123460	-1.79763	0.00731711	within:MTHFSD|NM_022764(-)//MTHFSD|NM_001159380(-)//MTHFSD|NM_001159377(-)//MTHFSD|NM_001159378(-)//MTHFSD|NM_001159379(-)//MTHFSD|NR_027489(-)//MTHFSD|NR_027490(-)	within	MTHFSD
chr4:7644027-7644728	-1.82025	0.00732044	within:SORCS2|NM_020777(+)	within	SORCS2
chr1:20335969-20339019	-1.80042	0.00732138	promoter region:PLA2G2F|NM_022819(+)	promoter region	PLA2G2F	PLA2G2F
chr19:55056647-55058098	-1.79607	0.00732381	within:PNKP|NM_007254(-)	within	PNKP
chr4:9052917-9055967	-1.818	0.00732819	promoter region:DEFB131|NM_001040448(+)	promoter region	DEFB131	DEFB131
chr19:5194781-5195481	-1.85382	0.00732889	within:PTPRS|NM_130853(-)//PTPRS|NM_130854(-)//PTPRS|NM_002850(-)//PTPRS|NM_130855(-)	within	PTPRS
chr9:135013799-135016849	-1.79429	0.00733056	promoter region:RALGDS|NM_001042368(-)	promoter region	RALGDS	RALGDS
chr11:127924215-127924916	-1.87083	0.00733576	within:ETS1|NM_001143820(-)	within	ETS1
chr6:109554759-109557809	2.156	0.00733951	promoter region:C6orf182|NM_173830(+)	promoter region	C6orf182	C6orf182
chr19:1386922-1389972	-2.11159	0.00734125	promoter region:RPS15|NM_001018(+)	promoter region	RPS15	RPS15
chr10:134933490-134934191	-1.85866	0.00734298	within:ADAM8|NM_001109(-)	within	ADAM8
chr10:128183061-128183761	-2.03245	0.00734782	within:C10orf90|NM_001004298(-)	within	C10orf90
chr16:4792065-4795115	-2.02352	0.00735401	promoter region:ROGDI|NM_024589(-)	promoter region	ROGDI	ROGDI
chr21:44505917-44508967	-1.80799	0.00735417	promoter region:DNMT3L|NM_013369(-)//DNMT3L|NM_175867(-)	promoter region	DNMT3L	DNMT3L
chr9:139855349-139857246	-1.857	0.00735634	left:FLJ40292|NR_024341(78055+)	left	FLJ40292
chr9:138106469-138107288	-1.77914	0.0073577	within:NACC2|NM_144653(-)	within	NACC2
chr3:156509941-156510642	-2.1928	0.00735881	left:MME|NM_007289(229169+)	left	MME
chr22:29865859-29868909	-1.78348	0.00735951	promoter region:PLA2G3|NM_015715(-)	promoter region	PLA2G3	PLA2G3
chr3:50304403-50307470	-1.80945	0.00736177	promoter region:IFRD2|NM_006764(-)	promoter region	IFRD2	IFRD2
chr17:76778983-76779779	-2.09037	0.00736245	within:AZI1|NM_001009811(-)//AZI1|NM_014984(-)	within	AZI1
chr6:5080132-5080833	-1.80521	0.00736569	within:LYRM4|NM_020408(-)	within	LYRM4
chr10:134768505-134769205	-2.1275	0.00736679	within:GPR123|NM_001083909(+)	within	GPR123
chr19:806486-807186	-2.05798	0.00736807	within:ELANE|NM_001972(+)	within	ELANE
chr16:714518-719418	-1.96899	0.00736926	promoter region:HAGHL|NM_032304(+)//CCDC78|NM_001031737(-)//HAGHL|NM_207112(+)	promoter region	HAGHL	HAGHL
chr8:124930967-124934017	-1.78089	0.00737137	promoter region:FER1L6|NM_001039112(+)	promoter region	FER1L6	FER1L6
chr4:1706491-1707192	-1.79292	0.00737151	within:TACC3|NM_006342(+)	within	TACC3
chr1:41399023-41402073	-1.78675	0.00737446	promoter region:SCMH1|NM_001031694(-)	promoter region	SCMH1	SCMH1
chr16:2185856-2188906	-1.84896	0.00737491
chr9:96526374-96529424	2.12911	0.00738435	promoter region:C9orf3|NM_032823(+)	promoter region	C9orf3	C9orf3
chr19:530140-530841	-1.78042	0.00738526	within:BSG|NM_198591(+)//BSG|NM_001728(+)//BSG|NM_198589(+)	within	BSG
chr16:2089833-2090534	-1.77687	0.0073856	within:PKD1|NM_000296(-)//PKD1|NM_001009944(-)	within	PKD1
chr7:142848227-142851277	-1.80385	0.0073863	promoter region:TAS2R60|NM_177437(+)	promoter region	TAS2R60	TAS2R60
chr1:45224259-45227309	-1.81888	0.00738843	promoter region:EIF2B3|NM_020365(-)	promoter region	EIF2B3	EIF2B3
chr2:241154336-241157386	-1.79583	0.00738888	promoter region:RNPEPL1|NM_018226(+)	promoter region	RNPEPL1	RNPEPL1
chr19:62014099-62017149	2.181	0.00739136	promoter region:PEG3AS|NR_023847(+)	promoter region	PEG3AS	PEG3AS
chr2:11668020-11668720	-1.79262	0.00739277	within:GREB1|NM_014668(+)	within	GREB1
chr12:120780542-120783592	-2.30008	0.00739784	promoter region:HPD|NM_002150(-)	promoter region	HPD	HPD
chr6:44232085-44235135	-2.10082	0.00739855	promoter region:CAPN11|NM_007058(+)	promoter region	CAPN11	CAPN11
chr22:36363189-36366239	-1.80313	0.00741138	promoter region:SH3BP1|NM_018957(+)	promoter region	SH3BP1	SH3BP1
chrX:154899258-154899958	-1.78576	0.00741266	left:IL9R|NR_024033//IL9R|NM_002186(18819+)	left	IL9R
chr5:1126441-1127142	-1.79321	0.0074154	within:SLC12A7|NM_006598(-)	within	SLC12A7
chr19:58523936-58524637	2.127	0.00741903	left:BIRC8|NM_033341(37249-)	left	BIRC8
chr22:41899785-41900486	-2.10227	0.0074217	within:TTLL12|NM_015140(-)	within	TTLL12
chr1:1590619-1591319	-2.11974	0.00742285	within:CDK11B|NM_033488(-)//CDK11B|NM_033487(-)//CDK11B|NM_033489(-)//CDK11B|NM_033486(-)//CDK11B|NM_033493(-)//CDK11B|NM_033492(-)//SLC35E2B|NM_001110781(-)	within	CDK11B
chr19:3140582-3141282	-1.91792	0.00742296	within:NCLN|NM_020170(+)	within	NCLN
chr2:130653732-130658604	-1.78675	0.00742481	promoter region:SMPD4|NM_017951(-)//SMPD4|NM_017751(-)//MZT2B|NM_025029(+)	promoter region	SMPD4	SMPD4
chr15:34959687-34960388	-1.79592	0.00742666	within:LOC145845|NR_024264(-)	within	LOC145845
chr19:61303983-61304683	-1.77042	0.007427	within:ZNF787|NM_001002836(-)	within	ZNF787
chr14:105061557-105067459	-2.13669	0.00742959	promoter region:TMEM121|NM_025268(+)	promoter region	TMEM121	TMEM121
chr9:137136950-137137650	-1.76933	0.00743431	within:OLFM1|NM_014279(+)	within	OLFM1
chr9:130880763-130883813	-2.069	0.00743838	promoter region:DOLPP1|NM_020438(+)//DOLPP1|NM_001135917(+)	promoter region	DOLPP1	DOLPP1
chr1:165357066-165357767	-1.76624	0.00743888	within:DUSP27|NM_001080426(+)	within	DUSP27
chr12:111303177-111304872	-1.77937	0.00743998	left:C12orf51|NM_001109662(74756-)	left	C12orf51
chr15:72512376-72515792	-1.78854	0.00744291	promoter region:SEMA7A|NM_003612(-)//SEMA7A|NM_001146029(-)//SEMA7A|NM_001146030(-)	promoter region	SEMA7A	SEMA7A
chr19:3599296-3599996	-1.82661	0.00744905	within:PIP5K1C|NM_012398(-)	within	PIP5K1C
chr12:77722013-77722713	-1.78196	0.00744995	left:NAV3|NM_014903(972814+)	left	NAV3
chr17:75372961-75373662	-1.78487	0.00745165	within:CBX2|NM_005189(+)	within	CBX2
chr9:115393580-115396630	-1.77115	0.00745272	promoter region:RGS3|NM_144489(+)	promoter region	RGS3	RGS3
chr14:104954790-104957840	-2.03001	0.00745714	promoter region:MTA1|NM_004689(+)	promoter region	MTA1	MTA1
chrY:18188873-18189573	2.11929	0.0074581	left:NLGN4Y|NM_014893(3043026+)	left	NLGN4Y
chr5:2801368-2810024	-1.786	0.0074588	promoter region:C5orf38|NM_178569(+)//IRX2|NM_033267(-)//IRX2|NM_001134222(-)	promoter region	C5orf38	C5orf38
chr9:69642237-69643493	-1.842	0.00746285	left:FOXD4L5|NM_001126334(173602-)	left	FOXD4L5
chr15:64580100-64586678	-2.01133	0.00746326	promoter region:RPL4|NM_000968(-)//SNORD18A|NR_002441(-)//ZWILCH|NR_003105(+)//ZWILCH|NM_017975(+)//SNORD18B|NR_002442(-)//SNORD18C|NR_002443(-)//SNORD16|NR_002440(-)	promoter region	RPL4	RPL4
chr11:1803494-1804195	-1.83917	0.00746458	left:MOB2|NM_053005(61417-)	left	MOB2
chr7:99863024-99866678	-1.767	0.00746497	promoter region:MEPCE|NM_019606(+)//ZCWPW1|NM_017984(-)	promoter region	MEPCE	MEPCE
chrX:1544434-1545573	-1.78083	0.00747217	within:P2RY8|NM_178129(-)	within	P2RY8
chr8:144487815-144490865	-2.19828	0.00747246	promoter region:TOP1MT|NM_052963(-)	promoter region	TOP1MT	TOP1MT
chr1:2395173-2398223	-1.76173	0.00748154	promoter region:PLCH2|NM_014638(+)	promoter region	PLCH2	PLCH2
chr16:87399104-87399804	-1.767	0.00749367	within:CDT1|NM_030928(+)	within	CDT1
chr10:71906129-71909179	-2.02396	0.0074956	promoter region:KIAA1274|NM_014431(+)	promoter region	KIAA1274	KIAA1274
chr19:59437926-59440976	-1.781	0.00749992	promoter region:LILRA6|NM_024318(-)	promoter region	LILRA6	LILRA6
chr6:169383486-169384187	-2.01469	0.00750008	within:THBS2|NM_003247(-)	within	THBS2
chr16:663635-666685	-1.7925	0.00750707	promoter region:RHBDL1|NM_003961(+)	promoter region	RHBDL1	RHBDL1
chr1:151629563-151632613	-1.9744	0.00750754	promoter region:S100A8|NM_002964(-)	promoter region	S100A8	S100A8
chr2:230796248-230799298	-1.76275	0.00750905	promoter region:SP140|NM_007237(+)//SP140|NM_001005176(+)	promoter region	SP140	SP140
chr1:22833264-22836314	-1.75589	0.00751339	promoter region:C1QA|NM_015991(+)	promoter region	C1QA	C1QA
chr5:180346066-180349116	-1.77462	0.00751435	promoter region:BTNL3|NM_197975(+)	promoter region	BTNL3	BTNL3
chr17:37245128-37248457	-1.84025	0.00751614	promoter region:KLHL10|NM_152467(+)//NT5C3L|NM_052935(-)	promoter region	KLHL10	KLHL10
chr11:60818327-60821804	-2.1041	0.00751761	promoter region:VWCE|NM_152718(-)	promoter region	VWCE	VWCE
chr16:902818-903532	-1.7788	0.00751896	within:LMF1|NM_022773(-)	within	LMF1
chr6:169028016-169028717	-1.75375	0.00752205	left:SMOC2|NM_022138(443137+)	left	SMOC2
chr8:144442493-144445543	-1.82869	0.00752665	promoter region:ZNF696|NM_030895(+)	promoter region	ZNF696	ZNF696
chr19:50231697-50234747	-1.75561	0.00753128	promoter region:SFRS16|NM_007056(+)	promoter region	SFRS16	SFRS16
chr11:76568182-76568883	-1.77354	0.00753174	within:MYO7A|NM_000260(+)//MYO7A|NM_001127179(+)//MYO7A|NM_001127180(+)	within	MYO7A
chr6:31195592-31198642	-1.84667	0.00753422	promoter region:CDSN|NM_001264(-)	promoter region	CDSN	CDSN
chr9:138674757-138677812	-1.91298	0.00754106	promoter region:EGFL7|NM_201446(+)//EGFL7|NM_016215(+)	promoter region	EGFL7	EGFL7
chr19:7702447-7705497	-1.75333	0.00755257	promoter region:CLEC4G|NM_198492(-)	promoter region	CLEC4G	CLEC4G
chr3:197119667-197122717	-2.10956	0.00755847	promoter region:TNK2|NM_005781(-)	promoter region	TNK2	TNK2
chr12:69600241-69603291	2.13672	0.00756203	promoter region:PTPRR|NM_002849(-)	promoter region	PTPRR	PTPRR
chrY:6171041-6174873	2.07427	0.00756207	promoter region:TTTY23|NR_001540(-)//TTTY23B|NR_003593(-)//TSPY2|NM_022573(+)	promoter region	TTTY23	TTTY23
chr5:139040578-139041279	-2.06569	0.00756272	within:CXXC5|NM_016463(+)	within	CXXC5
chr11:30206698-30209748	2.10333	0.00756339	promoter region:FSHB|NM_001018080(+)//FSHB|NM_000510(+)	promoter region	FSHB	FSHB
chr4:3419270-3419971	-1.74708	0.0075667	within:HGFAC|NM_001528(+)	within	HGFAC
chr4:1505219-1505920	-1.77442	0.00756705	left:CRIPAK|NM_175918(129880+)	left	CRIPAK
chr17:18815160-18815861	-2.02668	0.00757562	within:FAM83G|NM_001039999(-)//SLC5A10|NM_152351(+)//SLC5A10|NM_001042450(+)	within	FAM83G
chr11:131065317-131066018	-2.17737	0.00757847	within:NTM|NM_001048209(+)	within	NTM
chr19:7700793-7702410	-1.75458	0.00758417	within:CLEC4G|NM_198492(-)	within	CLEC4G
chr3:51975899-51978949	-1.86	0.00758537	promoter region:PCBP4|NM_033008(-)	promoter region	PCBP4	PCBP4
chr1:27746764-27747465	-2.05403	0.00759382	within:AHDC1|NM_001029882(-)	within	AHDC1
chr8:52483715-52484774	-1.81381	0.00759626	within:PXDNL|NM_144651(-)	within	PXDNL
chr20:62149868-62153863	-1.98863	0.00759872	promoter region:SOX18|NM_018419(-)	promoter region	SOX18	SOX18
chr10:123342861-123350402	-2.08686	0.00760272	promoter region:FGFR2|NM_001144919(-)//FGFR2|NM_001144916(-)//FGFR2|NM_001144917(-)//FGFR2|NM_001144914(-)//FGFR2|NM_022970(-)//FGFR2|NM_001144915(-)//FGFR2|NM_001144918(-)//FGFR2|NM_001144913(-)//FGFR2|NM_000141(-)	promoter region	FGFR2	FGFR2
chr17:40466804-40467505	2.20907	0.0076143	within:DCAKD|NM_001128631(-)//DCAKD|NM_024819(-)	within	DCAKD
chrX:134257058-134257758	-1.74771	0.00761893	within:ZNF75D|NM_007131(-)	within	ZNF75D
chr11:62444978-62448157	-1.74045	0.00763061	promoter region:CHRM1|NM_000738(-)	promoter region	CHRM1	CHRM1
chr14:103062821-103065871	-1.74891	0.00763207	promoter region:TRMT61A|NM_152307(+)	promoter region	TRMT61A	TRMT61A
chr1:109881576-109884626	-1.77535	0.00763284	promoter region:GPR61|NM_031936(+)	promoter region	GPR61	GPR61
chr19:61430861-61433911	2.08567	0.00763792	promoter region:ZSCAN5A|NM_024303(-)	promoter region	ZSCAN5A	ZSCAN5A
chr12:131669298-131670649	-1.88042	0.00765031	within:FBRSL1|NM_001142641(+)	within	FBRSL1
chr20:41517477-41520736	-1.73438	0.00765043	promoter region:SRSF6|NM_006275(+)	promoter region	SRSF6	SRSF6
chr5:808713-809414	-1.755	0.00765374	left:TPPP|NM_007030(62203-)	left	TPPP
chr10:43177492-43178211	-1.73979	0.00765797	left:RASGEF1A|NM_145313(95119-)	left	RASGEF1A
chr19:7591152-7592182	-1.99834	0.00765857	within:XAB2|NM_020196(-)	within	XAB2
chr2:27382587-27387074	-1.74967	0.00766066	promoter region:UCN|NM_003353(-)	promoter region	UCN	UCN
chr19:45578401-45579101	-2.14086	0.00766347	within:HIPK4|NM_144685(-)	within	HIPK4
chr6:29635071-29638121	2.0469	0.00766491	promoter region:UBD|NM_006398(-)	promoter region	UBD	UBD
chr8:145624125-145627175	-1.74208	0.00766585	promoter region:VPS28|NM_016208(-)//VPS28|NM_183057(-)	promoter region	VPS28	VPS28
chrX:101283434-101286484	-2.17575	0.00767195	promoter region:TCEAL6|NM_001006938(-)	promoter region	TCEAL6	TCEAL6
chr17:45631876-45636439	-1.74396	0.00767385	promoter region:COL1A1|NM_000088(-)	promoter region	COL1A1	COL1A1
chr1:231564085-231564785	2.05073	0.00767967	within:KIAA1804|NM_032435(+)	within	KIAA1804
chr14:99841573-99845053	-2.21008	0.00768107	promoter region:SLC25A29|NM_001039355(-)	promoter region	SLC25A29	SLC25A29
chr11:64928708-64929409	-1.96617	0.00768231	within:FRMD8|NM_031904(+)	within	FRMD8
chr19:469847-470905	-1.94167	0.00768273	left:C19orf20|NM_033513(11351+)	left	C19orf20
chr6:31657571-31663213	-1.73933	0.00768579	promoter region:LST1|NM_205840(+)//LST1|NM_205837(+)//LTB|NM_009588(-)//LST1|NM_205839(+)//LST1|NM_007161(+)//LST1|NM_205838(+)//LTB|NM_002341(-)	promoter region	LST1	LST1
chr7:56403567-56404267	-1.74274	0.0076879	left:LOC389493|NM_001145712(251983-)	left	LOC389493
chr17:78511507-78512547	-1.74337	0.00769131	within:B3GNTL1|NM_001009905(-)	within	B3GNTL1
chr8:47869232-47872282	2.0545	0.00769359	promoter region:BEYLA|NR_027012(+)//BEYLA|NR_027013(+)	promoter region	BEYLA	BEYLA
chr16:996600-997300	-1.75012	0.00769878	left:SOX8|NM_014587(24792+)	left	SOX8
chr2:108699928-108703102	2.12787	0.00769933	promoter region:RANBP2|NM_006267(+)	promoter region	RANBP2	RANBP2
chr22:25290760-25293810	-1.74875	0.0077007	promoter region:TPST2|NM_001008566(-)	promoter region	TPST2	TPST2
chr2:110575148-110579090	-2.05104	0.00770295	promoter region:LOC151009|NR_027244(-)	promoter region	LOC151009	LOC151009
chr19:10087083-10087783	-1.72783	0.00770532	within:EIF3G|NM_003755(-)	within	EIF3G
chr1:226356292-226360085	-1.73521	0.00770565	promoter region:C1orf35|NM_024319(-)	promoter region	C1orf35	C1orf35
chr11:65166107-65166808	-1.75281	0.0077102	within:SIPA1|NM_006747(+)//SIPA1|NM_153253(+)	within	SIPA1
chr6:42253578-42254278	-1.782	0.00771266	within:GUCA1A|NM_000409(+)	within	GUCA1A
chr19:7717854-7720904	-2.16647	0.00772213	promoter region:CD209|NR_026692(-)//CD209|NM_001144893(-)//CD209|NM_001144895(-)//CD209|NM_021155(-)//CD209|NM_001144896(-)//CD209|NM_001144899(-)//CD209|NM_001144894(-)//CD209|NM_001144897(-)	promoter region	CD209	CD209
chr17:8181472-8184522	-2.05757	0.00772399	promoter region:ODF4|NM_153007(+)	promoter region	ODF4	ODF4
chr1:245815844-245818894	2.05762	0.0077266	promoter region:OR2G2|NM_001001915(+)	promoter region	OR2G2	OR2G2
chr11:1286805-1289855	2.03294	0.00772993	promoter region:TOLLIP|NM_019009(-)	promoter region	TOLLIP	TOLLIP
chr16:69276615-69279895	-1.73679	0.00773396
chr5:78316073-78320553	2.0748	0.00774002	promoter region:ARSB|NM_198709(-)//ARSB|NM_000046(-)	promoter region	ARSB	ARSB
chr5:10492568-10495618	2.02976	0.0077422	promoter region:ROPN1L|NM_031916(+)	promoter region	ROPN1L	ROPN1L
chr8:58334630-58336417	-1.72249	0.00774572	left:IMPAD1|NM_017813(265649-)	left	IMPAD1
chr4:672363-675413	-1.73	0.00774688	promoter region:MFSD7|NM_032219(-)	promoter region	MFSD7	MFSD7
chr19:40902296-40902997	-2.14371	0.00775554	within:MLL4|NM_014727(+)	within	MLL4
chr1:38282689-38287477	-1.72349	0.0077695	promoter region:POU3F1|NM_002699(-)	promoter region	POU3F1	POU3F1
chr20:1039465-1042515	-2.09773	0.00777065	promoter region:PSMF1|NM_178578(+)	promoter region	PSMF1	PSMF1
chr19:1343962-1344663	-1.76302	0.00777403	within:NDUFS7|NM_024407(+)	within	NDUFS7
chr19:47189612-47192662	-2.0364	0.00779759	promoter region:ATP1A3|NM_152296(-)	promoter region	ATP1A3	ATP1A3
chrX:48660707-48663797	-1.71619	0.0078095	promoter region:PIM2|NM_006875(-)	promoter region	PIM2	PIM2
chr10:135020635-135023959	-2.04582	0.00781322	promoter region:C10orf125|NM_001098483(-)//C10orf125|NM_198472(-)	promoter region	C10orf125	C10orf125
chr9:138446101-138447114	-2.06681	0.00781749	within:INPP5E|NM_019892(-)	within	INPP5E
chr7:555404-556105	-2.02809	0.00782107	left:PDGFA|NM_033023//PDGFA|NM_002607(29397-)	left	PDGFA
chr19:59925355-59928422	-2.13135	0.00782214	promoter region:KIR3DL3|NM_153443(+)//KIR3DP1|NM_001015070(+)	promoter region	KIR3DL3	KIR3DL3
chrX:51828735-51829436	-1.74063	0.00782693	left:SNORA11D|NR_003711//SNORA11E|NR_003712(5426-)	left	SNORA11D
chr2:128097857-128098558	-2.05877	0.00783611	within:MYO7B|NM_001080527(+)	within	MYO7B
chr2:239776921-239777622	2.08477	0.00783687	within:HDAC4|NM_006037(-)	within	HDAC4
chr21:43661046-43661747	-1.71575	0.00783767	within:SIK1|NM_173354(-)	within	SIK1
chr7:43930131-43934961	-2.16018	0.00784179	promoter region:UBE2D4|NM_015983(+)//URGCP|NM_001077664(-)	promoter region	UBE2D4	UBE2D4
chr10:3350014-3350948	-1.71873	0.00784869	left:PITRM1|NM_014889(145011-)	left	PITRM1
chr9:94125121-94130137	2.0334	0.0078504	promoter region:NOL8|NR_024020(-)//NOL8|NM_017948(-)//CENPP|NM_001012267(+)	promoter region	NOL8	NOL8
chr2:241624206-241624991	-1.7355	0.00785084	within:SNED1|NM_001080437(+)	within	SNED1
chr1:224475565-224478615	-1.71125	0.00785353	promoter region:MIXL1|NM_031944(+)	promoter region	MIXL1	MIXL1
chr17:78264164-78264865	-2.04438	0.00786797	left:RAB40B|NM_006822(14277-)	left	RAB40B
chr9:69075094-69077540	-1.73417	0.00786967	left:LOC100133920|NR_024443(133914+)	left	LOC100133920
chrY:6448167-6448868	2.02878	0.00787525	left:TTTY8B|NR_003591//TTTY8|NR_001533(46496-)	left	TTTY8B
chr14:22909417-22912467	-1.71812	0.00788178	promoter region:IL25|NM_022789(+)//IL25|NM_172314(+)	promoter region	IL25	IL25
chr11:69227021-69230727	-1.72536	0.00788735	promoter region:FGF19|NM_005117(-)	promoter region	FGF19	FGF19
chr21:38412974-38417764	1.9954	0.00789065	promoter region:DSCR8|NR_026840(+)//DSCR4|NM_005867(-)//DSCR8|NR_026839(+)//DSCR8|NR_026841(+)//DSCR8|NR_026838(+)//DSCR8|NR_026842(+)	promoter region	DSCR8	DSCR8
chr16:70305595-70308645	2.0206	0.00789068	promoter region:PHLPP2|NM_015020(-)	promoter region	PHLPP2	PHLPP2
chr5:1285123-1285823	-1.70417	0.00789896	within:SLC6A18|NM_182632(+)	within	SLC6A18
chr15:30247357-30248057	-1.88875	0.00790057	within:CHRNA7|NM_000746(+)	within	CHRNA7
chr16:87521440-87522141	-1.7025	0.00790357	within:CBFA2T3|NM_175931(-)//CBFA2T3|NM_005187(-)	within	CBFA2T3
chr15:99608674-99612089	2.09849	0.0079132	promoter region:CHSY1|NM_014918(-)	promoter region	CHSY1	CHSY1
chr19:17177631-17178331	-1.7194	0.00791393	within:MYO9B|NM_001130065(+)//MYO9B|NM_004145(+)	within	MYO9B
chr1:154446967-154450017	-1.69656	0.00793213	promoter region:PMF1|NM_007221(+)	promoter region	PMF1	PMF1
chr17:21259243-21260634	-2.07575	0.00793269	within:KCNJ12|NM_021012(+)	within	KCNJ12
chr11:67016989-67019291	-1.74542	0.00793615	within:PITPNM1|NM_004910(-)//PITPNM1|NM_001130848(-)	within	PITPNM1
chr10:47990390-47991091	-1.731	0.00794068	within:ZNF488|NM_153034(+)	within	ZNF488
chr6:41322652-41325702	-2.05878	0.00795176	promoter region:TREML2P1|NR_002794(+)	promoter region	TREML2P1	TREML2P1
chr4:9688193-9688893	-2.08519	0.00796242	within:WDR1|NM_017491(-)//WDR1|NM_005112(-)	within	WDR1
chrX:153534425-153537476	-2.17926	0.00797546	promoter region:CTAG2|NM_172377(-)//CTAG2|NM_020994(-)	promoter region	CTAG2	CTAG2
chrX:100762335-100765616	-1.69942	0.00798366	promoter region:ARMCX3|NM_177948(+)//ARMCX3|NM_177947(+)//ARMCX3|NM_016607(+)	promoter region	ARMCX3	ARMCX3
chr19:46009461-46010162	-1.69625	0.00798672	left:EGLN2|NM_053046(11441+)	left	EGLN2
chr22:35875298-35878348	-2.09864	0.00798731	promoter region:IL2RB|NM_000878(-)	promoter region	IL2RB	IL2RB
chr8:139994808-139997858	-1.69351	0.0079926	promoter region:COL22A1|NM_152888(-)	promoter region	COL22A1	COL22A1
chr6:170527931-170528928	-2.00463	0.00800427	within:FAM120B|NM_032448(+)	within	FAM120B
chr7:143399805-143402855	1.9713	0.00800623	promoter region:OR2A25|NM_001004488(+)	promoter region	OR2A25	OR2A25
chr19:53364762-53367812	-2.0225	0.00801139	promoter region:LIG1|NM_000234(-)	promoter region	LIG1	LIG1
chr19:387291-387991	-1.68475	0.00802698	within:SHC2|NM_012435(-)	within	SHC2
chr21:43172137-43175187	1.96754	0.0080347	promoter region:WDR4|NM_033661(-)//WDR4|NM_018669(-)	promoter region	WDR4	WDR4
chr10:104942232-104945486	-1.695	0.00803532	promoter region:NT5C2|NM_001134373(-)//NT5C2|NM_012229(-)	promoter region	NT5C2	NT5C2
chrY:22861953-22865007	1.99747	0.00804118	promoter region:RBMY1F|NM_152585(+)//RBMY2FP|NR_002193(+)	promoter region	RBMY1F	RBMY1F
chr4:1957290-1958058	-2.0226	0.00805692	within:WHSC2|NM_005663(-)	within	WHSC2
chr1:35430054-35433770	-2.12838	0.00805834	promoter region:SFPQ|NM_005066(-)	promoter region	SFPQ	SFPQ
chr2:96536963-96540013	-2.19306	0.00807229	promoter region:NEURL3|NR_026875(-)	promoter region	NEURL3	NEURL3
chr6:18372118-18375218	-2.02135	0.00808168	promoter region:DEK|NM_001134709(-)//DEK|NM_003472(-)	promoter region	DEK	DEK
chr17:72824751-72827801	-2.09434	0.00808411	promoter region:SEPT9|NM_006640(+)	promoter region	SEPT9	SEPT9
chrY:9219873-9222923	2.00713	0.00808426	promoter region:RBMY1A3P|NR_001547(-)	promoter region	RBMY1A3P	RBMY1A3P
chr2:242456834-242457535	-1.68125	0.00808702	left:PDCD1|NM_005018(7103-)	left	PDCD1
chr8:145173370-145174071	-1.68	0.008093	left:SPATC1|NM_001134374//SPATC1|NM_198572(14801+)	left	SPATC1
chr1:143786671-143789876	1.98467	0.0080971	promoter region:PDE4DIP|NM_022359(-)	promoter region	PDE4DIP	PDE4DIP
chr14:44791745-44794795	1.93933	0.00810458	promoter region:C14orf106|NM_018353(-)	promoter region	C14orf106	C14orf106
chr13:94045902-94048952	1.9653	0.00810718	promoter region:TGDS|NM_014305(-)	promoter region	TGDS	TGDS
chr7:2386250-2386950	-2.04708	0.00810872	left:EIF3B|NM_001037283//EIF3B|NM_003751(25251+)	left	EIF3B
chr14:105234644-105235345	-2.13954	0.00811371	left:TMEM121|NM_025268(170647+)	left	TMEM121
chr2:178645118-178648168	-2.13442	0.00811943	promoter region:PDE11A|NM_016953(-)	promoter region	PDE11A	PDE11A
chr2:190354615-190359782	1.94293	0.00812423	promoter region:ORMDL1|NM_001128150(-)//PMS1|NM_000534(+)//PMS1|NM_001128143(+)//ORMDL1|NM_016467(-)//PMS1|NM_001128144(+)	promoter region	ORMDL1	ORMDL1
chr1:18983063-18983763	-1.8331	0.00812692	left:PAX7|NM_002584//PAX7|NM_013945//PAX7|NM_001135254(152977+)	left	PAX7
chr17:38090449-38091150	-1.8695	0.00815207	within:CNTNAP1|NM_003632(+)	within	CNTNAP1
chrY:10355426-10359016	1.96942	0.00815228	promoter region:TTTY23|NR_001540(+)//TTTY23B|NR_003593(+)	promoter region	TTTY23	TTTY23
chr16:1214645-1217695	-2.02939	0.00815318	promoter region:TPSG1|NM_012467(-)	promoter region	TPSG1	TPSG1
chr11:59610272-59613322	1.9485	0.00815725	promoter region:MS4A2|NM_001142303(+)//MS4A2|NM_000139(+)	promoter region	MS4A2	MS4A2
chr8:145982919-145985969	-2.31542	0.00816306	promoter region:ZNF34|NM_030580(-)	promoter region	ZNF34	ZNF34
chr10:6302415-6303115	-2.15254	0.00818559	within:PFKFB3|NM_004566(+)//PFKFB3|NM_001145443(+)	within	PFKFB3
chr5:110100212-110103262	1.93913	0.00818986	promoter region:SLC25A46|NM_138773(+)	promoter region	SLC25A46	SLC25A46
chr6:108061856-108063386	-1.67104	0.00819536	within:SOBP|NM_018013(+)	within	SOBP
chr19:57624038-57627088	1.93847	0.00820338	promoter region:ZNF534|NM_001143938(+)//ZNF534|NM_001143939(+)	promoter region	ZNF534	ZNF534
chr19:1929370-1930984	-1.99022	0.00822866	within:CSNK1G2|NM_001319(+)	within	CSNK1G2
chr13:112820520-112821221	-1.66083	0.00823698	within:F7|NM_000131(+)//F7|NM_019616(+)	within	F7
chr12:6803351-6804052	-2.06175	0.00824795	within:GPR162|NM_019858(+)//GPR162|NM_014449(+)	within	GPR162
chr17:629822-634761	1.92733	0.00827677	promoter region:GLOD4|NM_016080(-)//RNMTL1|NM_018146(+)	promoter region	GLOD4	GLOD4
chr15:50096262-50099472	1.91427	0.00828393	promoter region:MAPK6|NM_002748(+)	promoter region	MAPK6	MAPK6
chr7:1550375-1551076	-1.66312	0.00829933	within:TMEM184A|NM_001097620(-)	within	TMEM184A
chr19:3676933-3679983	-2.1392	0.00830261	promoter region:TJP3|NM_014428(+)	promoter region	TJP3	TJP3
chr12:31688920-31691970	1.91881	0.00830834	promoter region:C12orf72|NM_001135864(+)	promoter region	C12orf72	C12orf72
chr5:1252269-1255319	-1.94732	0.00831356	promoter region:SLC6A19|NM_001003841(+)	promoter region	SLC6A19	SLC6A19
chr12:1525559-1526259	1.90814	0.00832276	left:ERC1|NM_015064//ERC1|NM_178040//ERC1|NM_178037//ERC1|NM_178038//ERC1|NM_178039(554895+)	left	ERC1
chr18:15320511-15321211	-2.01771	0.00832552	left:LOC644669|NR_027417(4593-)	left	LOC644669
chr5:60075118-60075818	-2.04458	0.00832686	left:DEPDC1B|NM_001145208//DEPDC1B|NM_018369(43368-)	left	DEPDC1B
chr11:64112417-64115467	1.8932	0.0083279	promoter region:SLC22A12|NM_144585(+)//SLC22A12|NM_153378(+)	promoter region	SLC22A12	SLC22A12
chr12:7752915-7755965	2.0253	0.00833616	promoter region:DPPA3|NM_199286(+)	promoter region	DPPA3	DPPA3
chr20:44007978-44008679	-2.07192	0.00835361	within:PCIF1|NM_022104(+)	within	PCIF1
chr4:1979512-1983197	1.92483	0.00835395	promoter region:WHSC2|NM_005663(-)	promoter region	WHSC2	WHSC2
chr19:42874446-42877496	1.89808	0.00835528	promoter region:ZNF781|NM_152605(-)	promoter region	ZNF781	ZNF781
chr10:118071489-118074539	1.8885	0.00835542	promoter region:C10orf96|NM_198515(+)	promoter region	C10orf96	C10orf96
chr3:158320508-158321208	1.94293	0.00835821	left:LEKR1|NM_001004316(293719+)	left	LEKR1
chr19:11548943-11553241	-2.0299	0.0083588	promoter region:ACP5|NM_001611(-)//ACP5|NM_001111034(-)//ACP5|NM_001111036(-)//ACP5|NM_001111035(-)	promoter region	ACP5	ACP5
chr19:45071831-45072531	-1.9731	0.00836099	within:FCGBP|NM_003890(-)	within	FCGBP
chr3:133853539-133856589	1.886	0.00836932	promoter region:UBA5|NM_198329(+)	promoter region	UBA5	UBA5
chr17:76058838-76059538	-2.04164	0.00837695	within:NPTX1|NM_002522(-)	within	NPTX1
chrX:152748140-152751637	-2.01107	0.00838383	promoter region:PDZD4|NM_032512(-)	promoter region	PDZD4	PDZD4
chr19:62728064-62731114	1.936	0.00838939	promoter region:ZNF549|NM_153263(+)	promoter region	ZNF549	ZNF549
chr5:1161576-1162277	-1.68875	0.00839097	within:SLC12A7|NM_006598(-)	within	SLC12A7
chr1:245776633-245779683	1.89383	0.00839737	promoter region:C1orf150|NM_145278(+)	promoter region	C1orf150	C1orf150
chr16:67721559-67726425	1.93237	0.00840962	promoter region:CHTF8|NM_001040144(-)//CHTF8|NM_001039690(-)//CHTF8|NM_001040146(-)//CIRH1A|NM_032830(+)	promoter region	CHTF8	CHTF8
chr7:62792003-62792703	-2.23992	0.00841589	left:LOC643955|NR_003952(390134-)	left	LOC643955
chr1:40397187-40400237	1.90907	0.00842988	promoter region:RLF|NM_012421(+)	promoter region	RLF	RLF
chr2:96167292-96170342	-2.01197	0.00844037	promoter region:ASTL|NM_001002036(-)	promoter region	ASTL	ASTL
chr11:72115138-72115839	-1.67275	0.008459	within:ARAP1|NM_001040118(-)	within	ARAP1
chr7:107230304-107233354	1.87383	0.00846662	promoter region:SLC26A3|NM_000111(-)	promoter region	SLC26A3	SLC26A3
chr10:12275526-12280589	1.97263	0.00846743	promoter region:CDC123|NM_006023(+)//NUDT5|NM_014142(-)	promoter region	CDC123	CDC123
chr1:115196537-115199587	1.93175	0.00847787	promoter region:SYCP1|NM_003176(+)	promoter region	SYCP1	SYCP1
chr17:45968821-45969521	-2.14396	0.00849237	within:EPN3|NM_017957(+)	within	EPN3
chr21:45245447-45246148	-1.97031	0.00849378	within:NCRNA00162|NR_024089(-)	within	NCRNA00162
chr18:46120289-46120989	-1.98295	0.00849464	left:CXXC1|NM_014593//CXXC1|NM_001101654(51599-)	left	CXXC1
chr5:68423133-68426247	2.02189	0.00850525	promoter region:SLC30A5|NM_024055(+)//SLC30A5|NM_022902(+)	promoter region	SLC30A5	SLC30A5
chr7:17302391-17305626	2.09769	0.00851033	promoter region:AHR|NM_001621(+)	promoter region	AHR	AHR
chrX:68442095-68442796	1.86067	0.00851509	left:PJA1|NM_022368(140030-)	left	PJA1
chr2:73971160-73974210	1.87833	0.00853998	promoter region:ACTG2|NM_001615(+)	promoter region	ACTG2	ACTG2
chr5:131434943-131437993	-1.9565	0.00854181	promoter region:CSF2|NM_000758(+)	promoter region	CSF2	CSF2
chr19:39759867-39762917	-1.95245	0.00855461	promoter region:LOC643719|NR_027620(-)	promoter region	LOC643719	LOC643719
chr14:76675638-76680327	-1.675	0.00857705	promoter region:ZDHHC22|NM_174976(-)	promoter region	ZDHHC22	ZDHHC22
chr9:138710070-138710770	-2.02607	0.00858386	left:AGPAT2|NM_006412//AGPAT2|NM_001012727(8338-)	left	AGPAT2
chr10:74537775-74540825	1.8926	0.00859214	promoter region:NUDT13|NM_015901(+)	promoter region	NUDT13	NUDT13
chr21:44888318-44891368	-2.10487	0.00860365	promoter region:KRTAP10-11|NM_198692(+)	promoter region	KRTAP10-11	KRTAP10-11
chr6:158875015-158878665	1.84652	0.00860967	promoter region:TMEM181|NM_020823(+)	promoter region	TMEM181	TMEM181
chr22:49505252-49506926	-1.63771	0.00861381	within:SHANK3|NM_001080420(+)	within	SHANK3
chr9:135434556-135437606	-2.05336	0.00861473	promoter region:FAM163B|NM_001080515(-)	promoter region	FAM163B	FAM163B
chr6:29708055-29711381	-2.01051	0.00861506	promoter region:GABBR1|NM_021905(-)//GABBR1|NM_021904(-)//GABBR1|NM_001470(-)	promoter region	GABBR1	GABBR1
chr17:61252513-61255563	1.84325	0.00861602	promoter region:CCDC46|NM_001037325(-)	promoter region	CCDC46	CCDC46
chr17_random:1443682-1444382	-2.13823	0.00861788	left:TBC1D3B|NM_001001417(150894+)	left	TBC1D3B
chr10:13738568-13739546	1.83711	0.00861808	within:FRMD4A|NM_018027(-)	within	FRMD4A
chr22:22074189-22077239	-2.01193	0.00862152	promoter region:ZDHHC8P1|NR_003950(-)	promoter region	ZDHHC8P1	ZDHHC8P1
chr4:142359058-142362108	1.8702	0.00862281	promoter region:ZNF330|NM_014487(+)	promoter region	ZNF330	ZNF330
chr4:69218359-69221409	1.95395	0.0086305	promoter region:UGT2B15|NM_001076(-)	promoter region	UGT2B15	UGT2B15
chr6:41114296-41118880	-2.08981	0.00864564	promoter region:UNC5CL|NM_173561(-)//TSPO2|NM_001010873(+)	promoter region	UNC5CL	UNC5CL
chr2:171795460-171798510	1.83427	0.00864781	promoter region:TLK1|NM_001136554(-)	promoter region	TLK1	TLK1
chr20:8058855-8061905	1.83501	0.00865597	promoter region:PLCB1|NM_015192(+)//PLCB1|NM_182734(+)	promoter region	PLCB1	PLCB1
chr8:9988035-9991085	1.8255	0.0086676	promoter region:MSRA|NM_001135671(+)	promoter region	MSRA	MSRA
chr3:11721350-11722051	2.00033	0.0086682	within:VGLL4|NM_014667(-)	within	VGLL4
chr6:166745773-166746473	-2.04543	0.00867178	within:RPS6KA2|NM_001006932(-)//RPS6KA2|NM_021135(-)	within	RPS6KA2
chr13:99983388-99986438	1.8511	0.00868309	promoter region:A2LD1|NM_033110(-)	promoter region	A2LD1	A2LD1
chr12:48474725-48475425	1.98533	0.00868348	within:NCKAP5L|NM_001037806(-)	within	NCKAP5L
chr12:130736641-130737341	-1.98837	0.00869009	left:LOC116437|NR_026670(521133+)	left	LOC116437
chr12:100979419-100982469	-2.24157	0.00869475	promoter region:CCDC53|NM_016053(-)	promoter region	CCDC53	CCDC53
chr7:100322124-100322824	-2.16932	0.00871086	within:SRRT|NM_001128853(+)//SRRT|NM_001128854(+)//SRRT|NM_001128852(+)//SRRT|NM_015908(+)	within	SRRT
chr1:9569123-9572173	-1.6175	0.00872417	promoter region:TMEM201|NM_001010866(+)//TMEM201|NM_001130924(+)	promoter region	TMEM201	TMEM201
chr9:124328783-124331833	1.82435	0.00872668	promoter region:OR1N1|NM_012363(-)	promoter region	OR1N1	OR1N1
chr12:4886893-4891432	-2.15203	0.00872689	promoter region:KCNA1|NM_000217(+)	promoter region	KCNA1	KCNA1
chr7:128569507-128572557	1.82794	0.00874385	promoter region:TSPAN33|NM_178562(+)	promoter region	TSPAN33	TSPAN33
chr3:43300567-43303617	1.83577	0.0087441	promoter region:SNRK|NM_017719(+)//SNRK|NM_001100594(+)	promoter region	SNRK	SNRK
chr19:53491949-53492650	1.8316	0.00875671	within:CCDC114|NM_144577(-)	within	CCDC114
chr21:42033985-42035017	-2.04494	0.00877358	within:RIPK4|NM_020639(-)	within	RIPK4
chr12:30739408-30742458	1.83783	0.00877588	promoter region:IPO8|NM_006390(-)	promoter region	IPO8	IPO8
chr17:39374749-39377799	-1.98161	0.00877739	promoter region:PPY|NM_002722(-)	promoter region	PPY	PPY
chr9:27286527-27289577	1.81129	0.00877799	promoter region:C9orf11|NM_020641(-)	promoter region	C9orf11	C9orf11
chr19:56824929-56827979	-2.20433	0.00877963	promoter region:SIGLEC5|NM_003830(-)	promoter region	SIGLEC5	SIGLEC5
chr11:67644553-67647874	-2.14269	0.00878363	promoter region:CHKA|NM_001277(-)//CHKA|NM_212469(-)	promoter region	CHKA	CHKA
chr3:126135660-126138710	2.02117	0.00879261	promoter region:MUC13|NM_033049(-)	promoter region	MUC13	MUC13
chr2:241021347-241024993	-2.03533	0.00879422	promoter region:GPC1|NM_002081(+)	promoter region	GPC1	GPC1
chr2:172484763-172487813	-2.15187	0.00880014	promoter region:HAT1|NM_001033085(+)//HAT1|NM_003642(+)	promoter region	HAT1	HAT1
chr17:659688-660388	-2.16506	0.00880035	within:NXN|NM_022463(-)	within	NXN
chr16:2223882-2228074	-1.98942	0.00883666	promoter region:DNASE1L2|NM_001374(+)	promoter region	DNASE1L2	DNASE1L2
chr6_random:1286715-1305180	1.79815	0.00884463	left:C6orf124|NM_001042508(472523-)	left	C6orf124
chr1:74434073-74438899	1.80243	0.00885044	promoter region:LRRIQ3|NM_001105659(-)//FPGT|NM_003838(+)//TNNI3K|NM_001112808(+)	promoter region	LRRIQ3	LRRIQ3
chrX:100434091-100437141	1.88943	0.00885214	promoter region:TAF7L|NM_024885(-)	promoter region	TAF7L	TAF7L
chr20:43885926-43886626	-2.08395	0.00885712	within:TNNC2|NM_003279(-)	within	TNNC2
chr5:179151151-179154201	-1.9824	0.00886229	promoter region:LTC4S|NM_145867(+)	promoter region	LTC4S	LTC4S
chr11:1447587-1448287	-2.05448	0.00887623	within:MOB2|NM_053005(-)	within	MOB2
chr11:94344052-94348864	1.79286	0.00889497	promoter region:CWC15|NM_016403(-)//KDM4D|NM_018039(+)	promoter region	CWC15	CWC15
chr4:183957652-183958733	1.8168	0.00890072	within:ODZ3|NM_001080477(+)	within	ODZ3
chr8:1484138-1485291	-2.02047	0.0089103	within:DLGAP2|NM_004745(+)	within	DLGAP2
chr13:32657606-32660656	1.82477	0.00894424	promoter region:STARD13|NM_178007(-)	promoter region	STARD13	STARD13
chr21:43655076-43655777	-2.05588	0.0089607	left:CRYAA|NM_000394(192867+)	left	CRYAA
chr9:35816781-35821184	-2.08135	0.0089631	promoter region:TMEM8B|NM_016446(+)//TMEM8B|NM_001042589(+)//C9orf128|NM_001012446(-)//TMEM8B|NM_001042590(+)	promoter region	TMEM8B	TMEM8B
chr11:624864-630628	-2.17326	0.00896827	promoter region:DRD4|NM_000797(+)	promoter region	DRD4	DRD4
chrX:56604356-56607406	1.77821	0.00897312	promoter region:UBQLN2|NM_013444(+)	promoter region	UBQLN2	UBQLN2
chr13:110011462-110014512	1.81337	0.0089772	promoter region:RAB20|NM_017817(-)	promoter region	RAB20	RAB20
chr1:171286116-171289166	1.77667	0.00897799	promoter region:TNFSF18|NM_005092(-)	promoter region	TNFSF18	TNFSF18
chr8:9946799-9950043	-2.20067	0.00898386	promoter region:MSRA|NM_012331(+)//MSRA|NM_001135670(+)	promoter region	MSRA	MSRA
chr19:3775968-3776668	-1.9905	0.00898696	within:ZFR2|NM_015174(-)	within	ZFR2
chrX:55036626-55039676	1.77483	0.00900483	promoter region:PFKFB1|NM_002625(-)	promoter region	PFKFB1	PFKFB1
chr15:70276502-70279630	-2.0907	0.00904232	promoter region:GRAMD2|NM_001012642(-)	promoter region	GRAMD2	GRAMD2
chr19:60959878-60962928	2.01481	0.00906178	promoter region:RFPL4A|NM_001145014(+)	promoter region	RFPL4A	RFPL4A
chr12:111106531-111107232	-2.04414	0.00907104	within:C12orf51|NM_001109662(-)	within	C12orf51
chr1:177825207-177828257	1.77367	0.00907692	promoter region:TDRD5|NM_173533(+)	promoter region	TDRD5	TDRD5
chr9:125172596-125173297	-2.00975	0.00907848	within:CRB2|NM_173689(+)	within	CRB2
chr9:138994825-138997875	-1.96574	0.00911339	promoter region:LCNL1|NM_207510(+)	promoter region	LCNL1	LCNL1
chr9:138756622-138759672	-1.97827	0.00912168	promoter region:LCN10|NM_001001712(-)	promoter region	LCN10	LCN10
chr16:30523182-30523883	-2.15035	0.00913185	within:ZNF689|NM_138447(-)	within	ZNF689
chr18:19704541-19707591	1.74903	0.00913471	promoter region:LAMA3|NM_001127718(+)//LAMA3|NM_000227(+)	promoter region	LAMA3	LAMA3
chr12:52187079-52190129	1.0335	0.00914297	promoter region:NPFF|NM_003717(-)	promoter region	NPFF	NPFF
chr4:3493803-3494504	-1.99958	0.00914527	within:LRPAP1|NM_002337(-)	within	LRPAP1
chr20:42713180-42716230	0.897214	0.00915586	promoter region:ADA|NM_000022(-)	promoter region	ADA	ADA
chr4:4278912-4281962	-1.71292	0.00917721	promoter region:OTOP1|NM_177998(-)	promoter region	OTOP1	OTOP1
chr2:61095875-61101309	1.74813	0.00918509	promoter region:PEX13|NM_002618(+)//PUS10|NM_144709(-)	promoter region	PEX13	PEX13
chr4:68611000-68614050	2.0168	0.00918593	promoter region:SYT14L|NR_027094(-)	promoter region	SYT14L	SYT14L
chr2:666651-669879	1.75005	0.00918811	promoter region:TMEM18|NM_152834(-)	promoter region	TMEM18	TMEM18
chr17_random:1432390-1433090	-2.04	0.00919656	left:TBC1D3B|NM_001001417(139602+)	left	TBC1D3B
chr16:87292371-87293071	-2.00821	0.0092008	within:RNF166|NM_178841(-)	within	RNF166
chr6:129292559-129293259	1.83381	0.00923988	within:LAMA2|NM_000426(+)//LAMA2|NM_001079823(+)	within	LAMA2
chr11:46120977-46121678	-2.08567	0.00924261	left:PHF21A|NM_016621//PHF21A|NM_001101802(21416-)	left	PHF21A
chr1:151587036-151590086	-1.98704	0.00925212	promoter region:PGLYRP4|NM_020393(-)	promoter region	PGLYRP4	PGLYRP4
chr17:40923283-40926333	-2.08162	0.00925532	promoter region:PLEKHM1|NM_014798(-)	promoter region	PLEKHM1	PLEKHM1
chr16:87087105-87087806	-2.03066	0.00926161	within:ZFPM1|NM_153813(+)	within	ZFPM1
chrY:211398-215968	-2.01837	0.00926378	left:GTPBP6|NM_012227(40511-)	left	GTPBP6
chr20:31104450-31107500	-1.88832	0.00927188	promoter region:C20orf185|NM_182658(+)	promoter region	C20orf185	C20orf185
chr13:113526723-113529773	-2.07137	0.00930215	promoter region:FLJ44054|NR_024609(-)	promoter region	FLJ44054	FLJ44054
chr2:46375626-46380644	1.53064	0.00933381	promoter region:EPAS1|NM_001430(+)	promoter region	EPAS1	EPAS1
chr20:62175524-62176387	-2.08076	0.00934037	within:RGS19|NM_001039467(-)//RGS19|NM_005873(-)	within	RGS19
chr16:82883461-82886511	-2.06792	0.00935145	promoter region:WFDC1|NM_021197(+)	promoter region	WFDC1	WFDC1
chr21:46369615-46370640	-2.04342	0.00935878	within:COL6A2|NM_001849(+)//COL6A2|NM_058175(+)//COL6A2|NM_058174(+)	within	COL6A2
chr12:90029063-90032113	1.7214	0.00936262	promoter region:LUM|NM_002345(-)	promoter region	LUM	LUM
chr11:815144-818194	-1.9779	0.00938581	promoter region:EFCAB4A|NM_173584(+)	promoter region	EFCAB4A	EFCAB4A
chr12:68037358-68040408	1.74833	0.00938587	promoter region:YEATS4|NM_006530(+)	promoter region	YEATS4	YEATS4
chr1:232558945-232559645	-2.11957	0.00939421	left:SLC35F3|NM_173508(451644+)	left	SLC35F3
chr2:241043848-241047230	-1.96274	0.0093951	promoter region:PP14571|NR_024014(-)	promoter region	PP14571	PP14571
chr5:176004553-176007603	-2.06792	0.00939829	promoter region:TSPAN17|NM_130465(+)//TSPAN17|NM_012171(+)//TSPAN17|NM_001006616(+)	promoter region	TSPAN17	TSPAN17
chr9:139242765-139245815	-1.9166	0.00939917	promoter region:SLC34A3|NM_080877(+)	promoter region	SLC34A3	SLC34A3
chr4:939152-939853	-1.93971	0.00940326	within:TMEM175|NM_032326(+)	within	TMEM175
chr15:72921995-72925045	-2.0376	0.00940489	promoter region:ULK3|NM_001099436(-)	promoter region	ULK3	ULK3
chr8:144364002-144367052	-1.94305	0.00942337	promoter region:GPIHBP1|NM_178172(+)	promoter region	GPIHBP1	GPIHBP1
chr19:532112-532812	-1.94003	0.00943192	within:BSG|NM_198591(+)//BSG|NM_001728(+)//BSG|NM_198589(+)	within	BSG
chr9:21021025-21024075	1.71992	0.00943623	promoter region:PTPLAD2|NM_001010915(-)	promoter region	PTPLAD2	PTPLAD2
chr22:17658629-17661679	-1.994	0.0094414	promoter region:CLTCL1|NM_007098(-)	promoter region	CLTCL1	CLTCL1
chr9:134893442-134896492	-2.15837	0.00945654	promoter region:GTF3C5|NM_001122823(+)//GTF3C5|NM_012087(+)	promoter region	GTF3C5	GTF3C5
chr22:16704318-16705018	-1.94675	0.00945707	within:MICAL3|NM_001122731(-)//MICAL3|NM_015241(-)	within	MICAL3
chr19:566691-574505	-1.98164	0.00950101	left:HCN2|NM_001194(25799+)	left	HCN2
chr19:3158688-3159389	-1.98771	0.00950488	within:NCLN|NM_020170(+)	within	NCLN
chr7:75512888-75517697	1.80007	0.00951705	promoter region:STYXL1|NM_016086(-)//MDH2|NM_005918(+)	promoter region	STYXL1	STYXL1
chr11:8009593-8010294	-2.02921	0.00952846	left:EIF3F|NM_003754(44151+)	left	EIF3F
chrX:2428315-2431455	-2.08308	0.0095691	promoter region:ZBED1|NM_004729(-)//DHRSX|NM_145177(-)	promoter region	ZBED1	ZBED1
chr5:422953-423654	1.99093	0.00957293	within:AHRR|NM_020731(+)	within	AHRR
chrX:99959563-99962613	-2.07875	0.00958911	promoter region:CSTF2|NM_001325(+)	promoter region	CSTF2	CSTF2
chr17:928028-928728	-2.11095	0.00959328	within:ABR|NM_001092(-)//ABR|NM_021962(-)//ABR|NM_001159746(-)	within	ABR
chr2:242636080-242636781	-2.08929	0.00961734	left:C2orf85|NM_173821(175522+)	left	C2orf85
chr19:11145877-11146577	-1.97958	0.0096254	within:KANK2|NM_015493(-)//KANK2|NM_001136191(-)	within	KANK2
chr10:62205785-62210514	1.273	0.00964996	promoter region:CDK1|NM_001130829(+)//CDK1|NM_001786(+)//CDK1|NM_033379(+)	promoter region	CDK1	CDK1
chr4:188221277-188221978	1.98245	0.00966091	left:FAT1|NM_005245(339296-)	left	FAT1
chr14:105104104-105104804	-1.98493	0.00971367	left:TMEM121|NM_025268(40107+)	left	TMEM121
chrX:153396957-153400007	-2.02175	0.00974054	promoter region:FAM3A|NM_021806(-)	promoter region	FAM3A	FAM3A
chrX:74921186-74924236	-2.05345	0.00976203	promoter region:MAGEE2|NM_138703(-)	promoter region	MAGEE2	MAGEE2
chr9:89510730-89511431	-2.08712	0.00977738	within:DAPK1|NM_004938(+)	within	DAPK1
chr16:32946422-32948108	-1.94052	0.00978874	left:SLC6A10P|NR_003083(142458-)	left	SLC6A10P
chr6:107496655-107498492	-1.9901	0.00979783	within:BEND3|NM_001080450(-)	within	BEND3
chr7:122129647-122132697	2.07158	0.00981012	promoter region:RNF148|NM_198085(-)	promoter region	RNF148	RNF148
chr7:1986107-1986808	-2.00135	0.00981273	within:MAD1L1|NM_003550(-)//MAD1L1|NM_001013837(-)//MAD1L1|NM_001013836(-)	within	MAD1L1
chr21:44047671-44048371	-2.09343	0.00981927	within:RRP1|NM_003683(+)	within	RRP1
chr19:10684398-10685098	-1.98539	0.00984749	left:QTRT1|NM_031209(11287+)	left	QTRT1
chr19:14552455-14555505	-2.03688	0.00985672	promoter region:CLEC17A|NM_207390(+)	promoter region	CLEC17A	CLEC17A
chr2:242223259-242227768	-1.92389	0.00987231	promoter region:ATG4B|NM_178326(+)//ATG4B|NM_013325(+)//THAP4|NM_015963(-)	promoter region	ATG4B	ATG4B
chr19:1429603-1432668	-2.11425	0.00988433	promoter region:C19orf25|NM_152482(-)	promoter region	C19orf25	C19orf25
chr1:45036182-45039370	-2.08711	0.00990086	promoter region:PLK3|NM_004073(+)	promoter region	PLK3	PLK3
